# Supplementary material for: Nitrate is an important nitrogen source for Arctic tundra plants
Source: PubMed Central journal article supplement — Proc Natl Acad Sci U S A. 2018 Mar 14;115(13):3398–403. doi: 10.1073/pnas.1715382115 (PMC5879661; doi:10.1073/pnas.1715382115), 2018-03-14
Supplement: pnas.1715382115.sapp.pdf [file pnas.1715382115.sapp.pdf]

## Supporting Information Appendix (SI Appendix)

Liu and Koba et al. Nitrate is an important nitrogen source for Arctic tundra plants

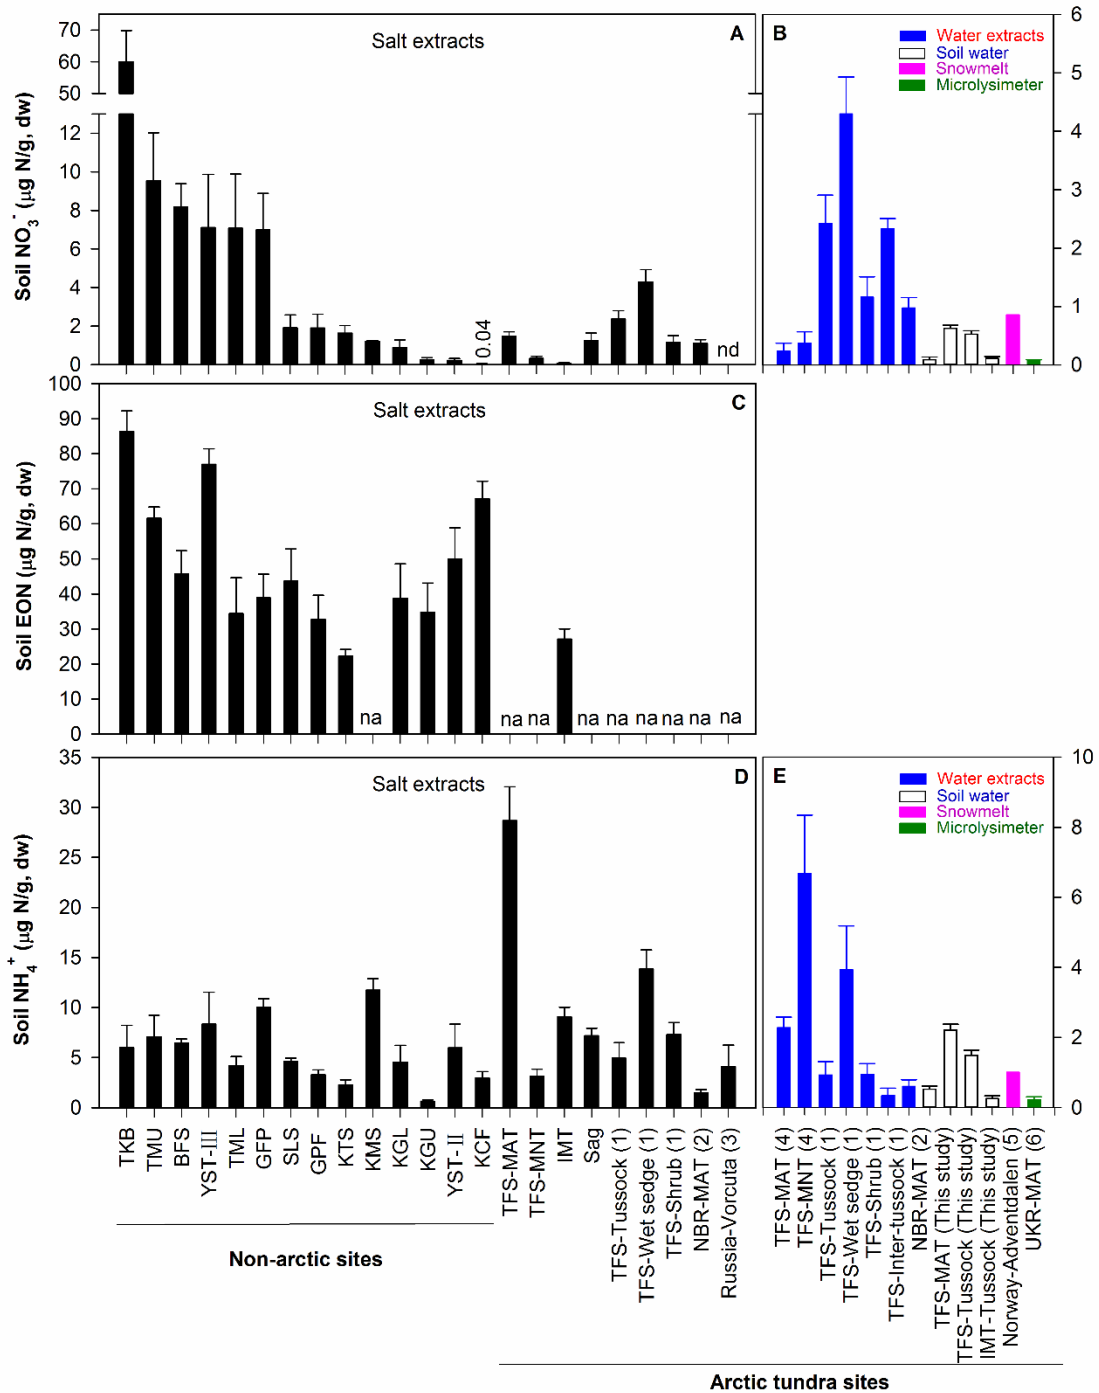

**Fig. S1.** Concentrations of  $\text{NO}_3^-$  (A, B), extractable organic N (EON) (C),  $\text{NH}_4^+$  (D, E) in salt extracts, water extracts, soil water, snowmelt and microlysimeter of soils across Arctic tundra and non-arctic ecosystems. Mean  $\pm$  Standard Error (SE) are shown. “nd” indicates not detected, “na” indicates not available or not measured. Data above the bar shows mean values. Salt-extractable N in soil at Toolik Field Station Moist Acidic Tundra (TFS-MAT,  $n = 135$ ) and Toolik Field Station Moist Nonacidic Tundra (TFS-MNT,  $n = 54$ ) was analyzed in June–August from 1990 to 2006 and from 1998 to 2006, respectively. Soil water of TFS-MAT ( $n = 4$  for 1 site) was sampled in August 2012; soil water of TFS-Tussock ( $n = 1073$  for  $\text{NH}_4^+$  and  $n = 1060$  for  $\text{NO}_3^-$  from 14 sites at Toolik Field Station) and IMT-Tussock ( $n = 690$  for  $\text{NH}_4^+$  and  $n = 576$  for  $\text{NO}_3^-$  from 13 sites at Imnavait Creek) was sampled in June–August from 1988 to 2011. TFS-NBR stands for Toolik Field Station near the Northern Brooks Range, and UKR stands for the Upper Kuparuk River, Alaska. Data for SAG ( $n = 150$ , from 1987 to 2005) were downloaded from the Arctic LTER database (<http://arc-lter.ecosystems.mbl.edu/>). Other data of N in soil extracts (salt ( $\text{K}_2\text{SO}_4$ ) or water extracts) and soil solutions ( $n = 4$ –60) were cited from corresponding references (reference numbers are in the parentheses).

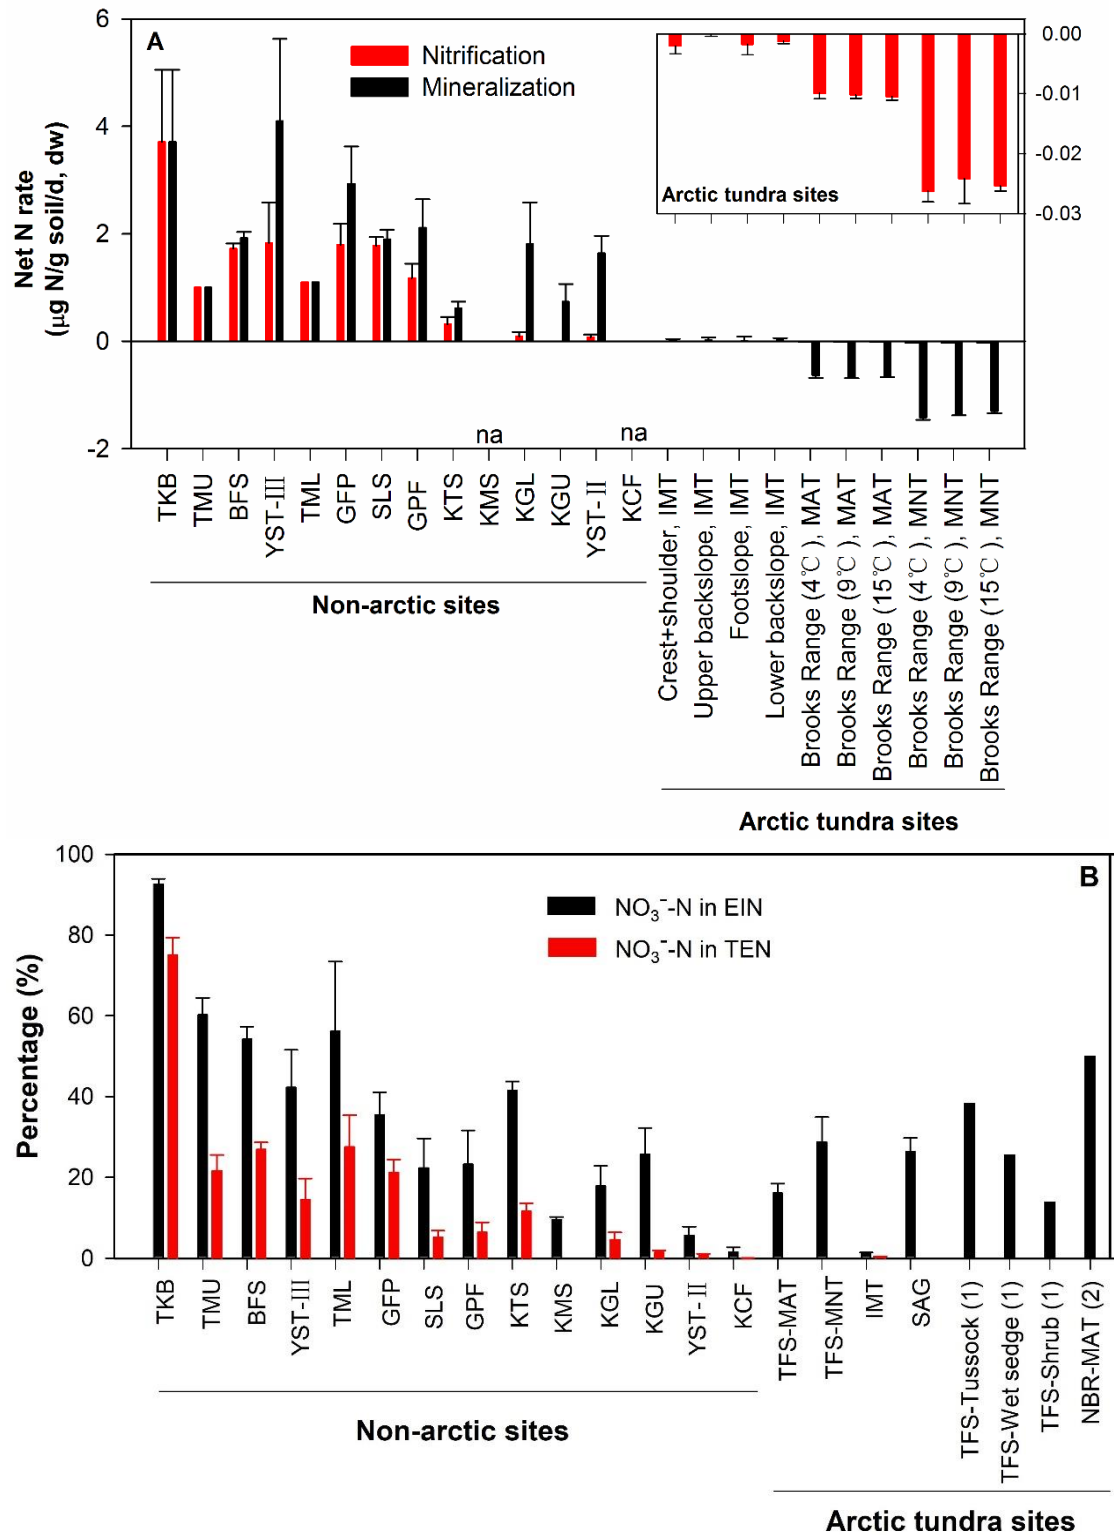

**Fig. S2.** Net N rates of nitrification and mineralization (A), and percentages of  $\text{NO}_3^-$ -N in salt-extractable inorganic N (EIN) or in total salt-extractable N (TEN) (B), of soils across the Arctic tundra and non-arctic ecosystems. Mean  $\pm$  SE are shown. In panel A, data of IMT were expressed as  $\text{g N/m}^2/\text{growing season}$ , while those of the Brooks Range around TFS were cited from (7). In panel B, EIN is the sum of  $\text{NH}_4^+$ -N and  $\text{NO}_3^-$ -N, and TEN is the sum of EIN and EON (extractable organic N) and the reference numbers for the data in Arctic tundra sites are in the parentheses.

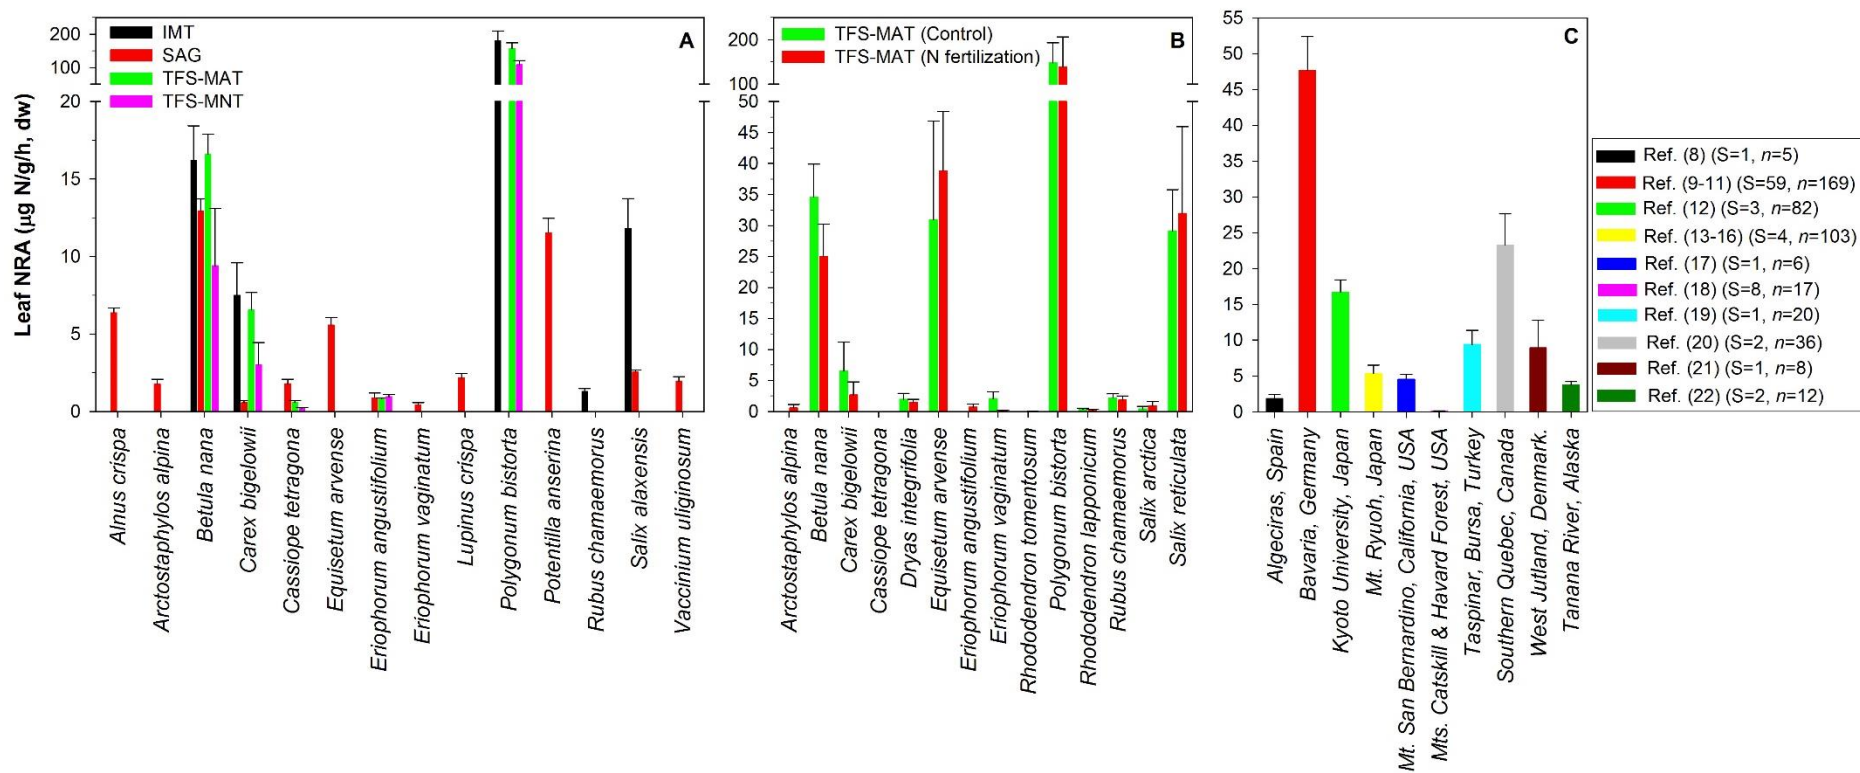

**Fig. S3.** Leaf nitrate reductase activities (NRA) of (A, B) tundra plants in northern Alaska and (C) terrestrial plants at lower latitude regions. Mean  $\pm$  SE are shown. In panel A, the bars of IMT showed averages across ecosystems including crest, upper backslope, lower water tracks, lower non-water track, and footslope at Imnavait Creek ( $n = 9-15$  for each species). The bars of SAG showed averages across ecosystems types along the Sagavanirktok River toposequence ( $n = 4-79$ ; cited from (23)).  $n = 5$  for TFS-MAT or TFS-MNT. In panel B, Control and N fertilization denote the control and N-fertilization plots at TFS-MAT, respectively ( $n = 3-5$ ). In panel C, bars are average values for total sample number ( $n$ ) of studied plant species ( $S$  is the species number) reported at each site.

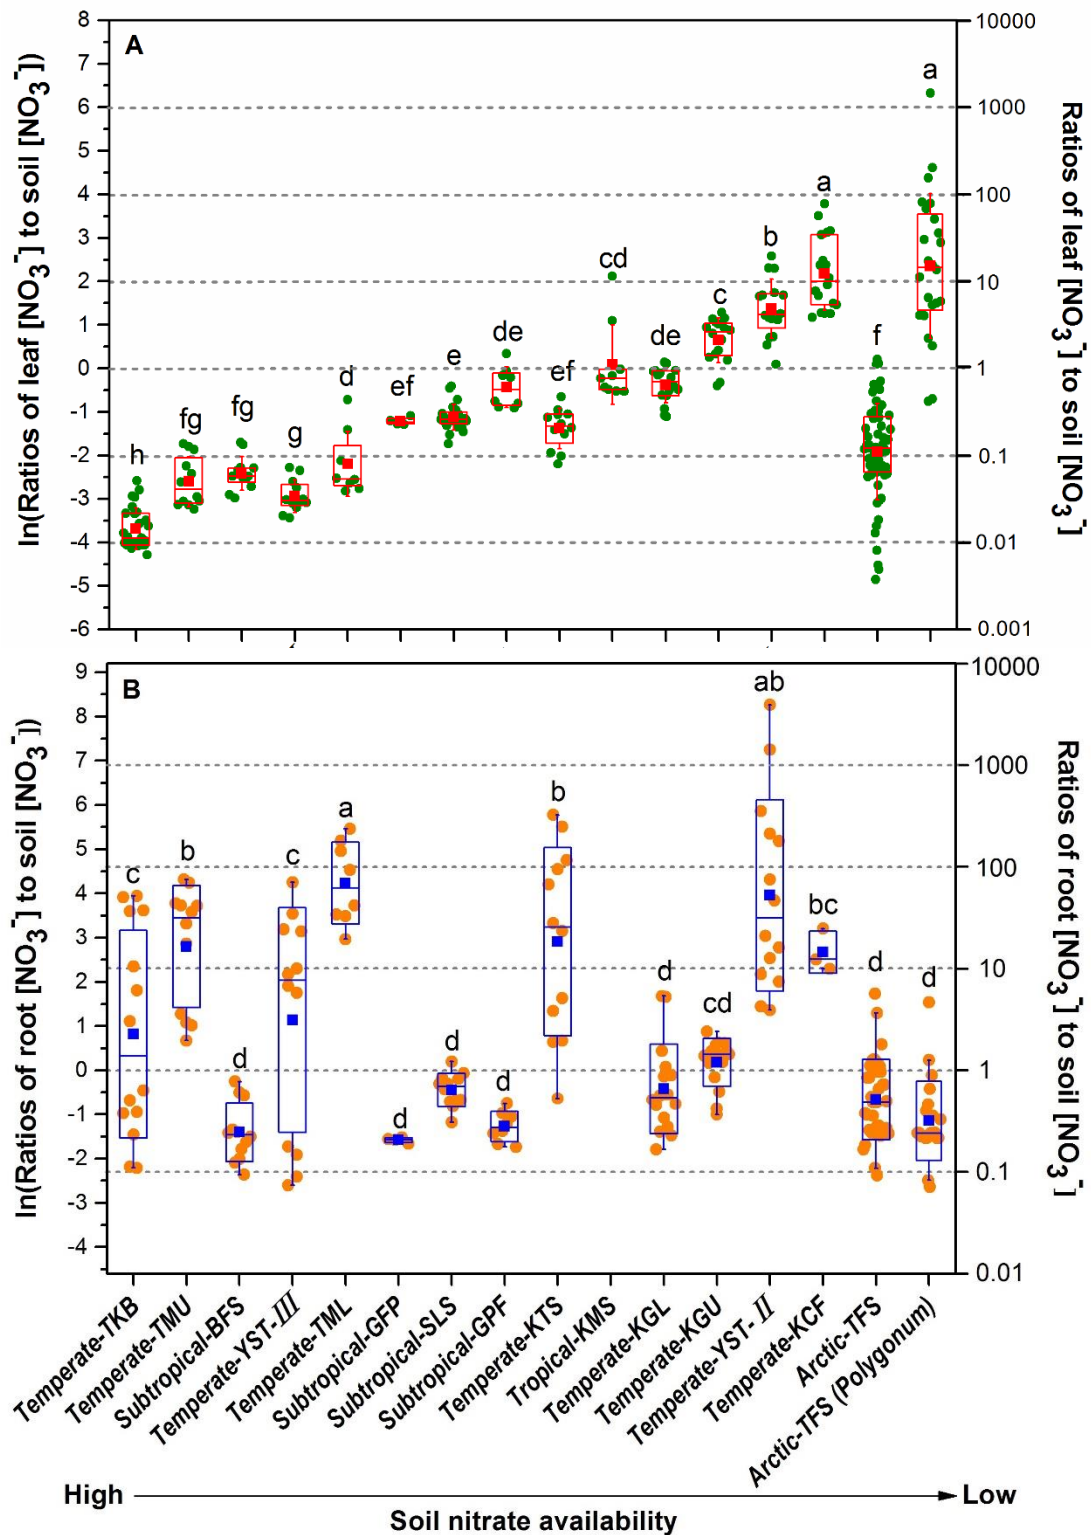

**Fig. S4.** Ratios of (A) leaf  $\text{NO}_3^-$  concentrations ( $[\text{NO}_3^-]$ ) to soil  $[\text{NO}_3^-]$  and (B) root  $[\text{NO}_3^-]$  to soil  $[\text{NO}_3^-]$  across different plants and ecosystems. Concentrations in the unit of  $\mu\text{g-N/g}$  dry plant or soil and mean concentrations of soil  $[\text{NO}_3^-]$  (Fig. S2a) were used for calculating the ratios. The box encompasses the 25<sup>th</sup>–75<sup>th</sup> percentiles, whiskers are the Standard Deviation (SD) values. The line and square in each box mark the median and mean values of plants at each site, respectively. Different letters above the boxes mark significant differences at the level of  $P < 0.05$ .

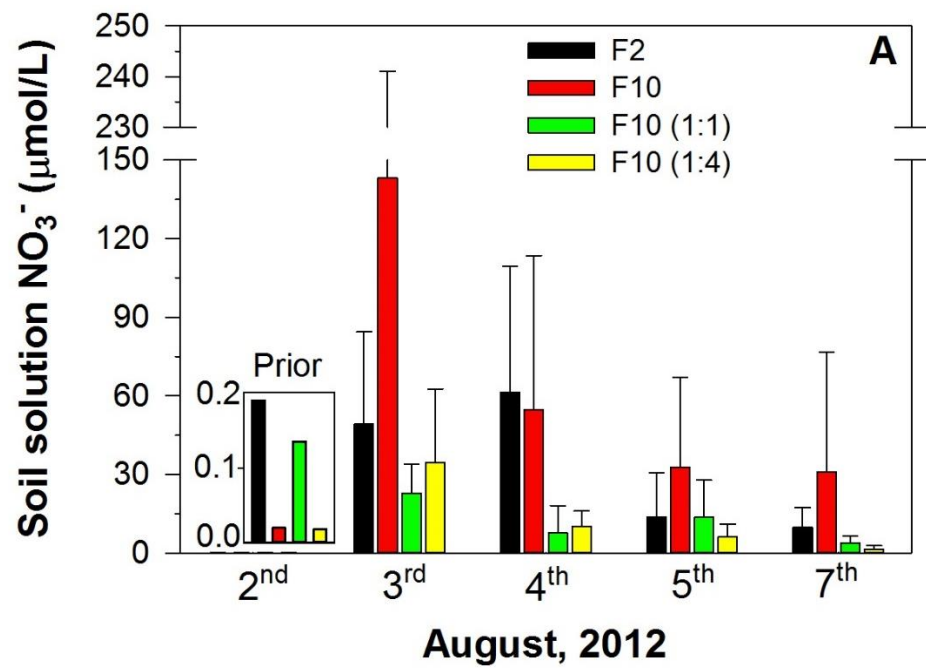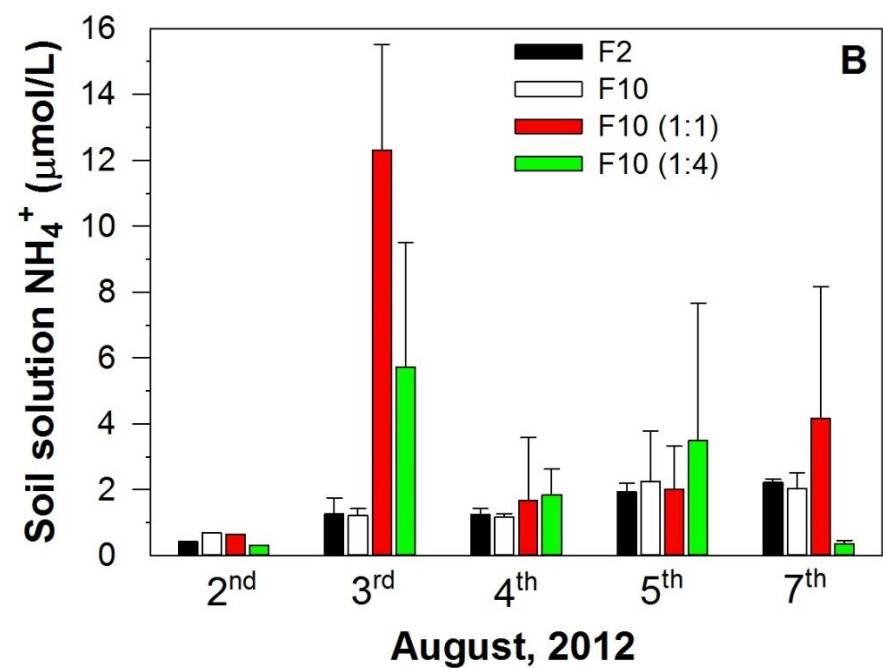

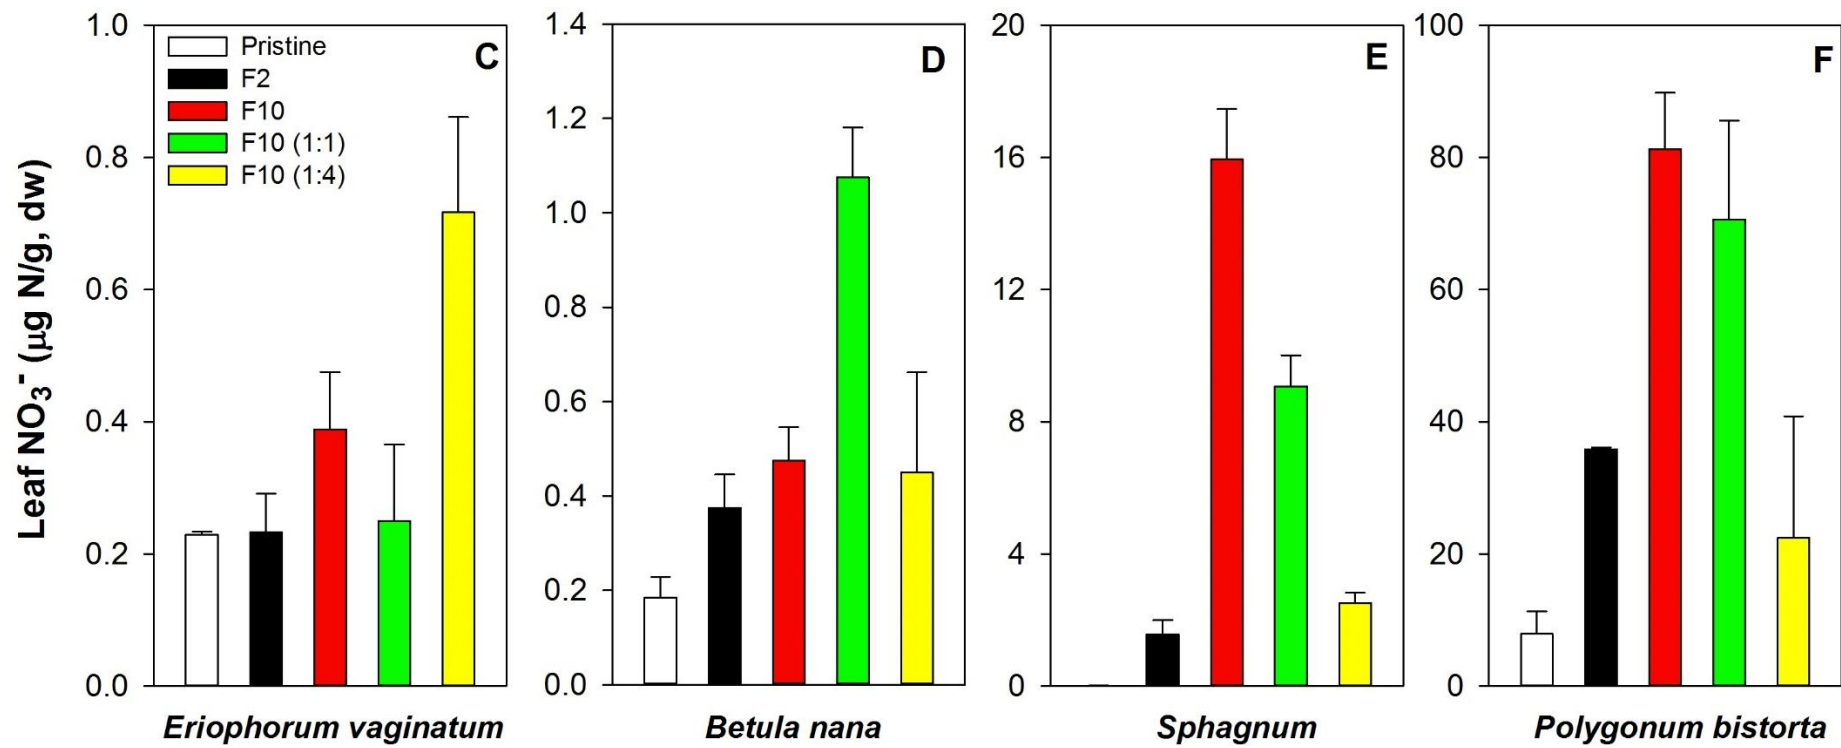

**Fig. S5.** Variations of  $\text{NO}_3^-$  and  $\text{NH}_4^+$  in soil water (A, B),  $\text{NO}_3^-$  in plant leaves (C-F) prior to and after N additions at TFS-MAT in 2012. In panels A and B, mean  $\pm$  SE values of replicate plots ( $n = 3$ ,  $1 \text{ m} \times 1 \text{ m}$  plot size for each) are shown. From panel C to panel F, “pristine” indicated mean  $\pm$  SE values of plant samples collected on 2<sup>nd</sup> August ( $n = 3$  for each species), others showed mean  $\pm$  SE values of plant samples collected on 3<sup>rd</sup> August ( $n = 1$  for *Betula nana* and *Polygonum bistorta*;  $n = 3$  for *Eriophorum vaginatum* and *Sphagnum*), 4<sup>th</sup> August ( $n = 1$  for each species), 5<sup>th</sup> August ( $n = 1$  for each species), 7<sup>th</sup> August ( $n = 1$  for each species) (therefore,  $n = 4$  for *Betula nana* and *Polygonum bistorta*,  $n = 6$  for *Eriophorum vaginatum* and *Sphagnum*). F2 and F10 represent  $\text{NO}_3^-$  fertilizer additions of  $2 \text{ g N/m}^2$  and  $10 \text{ g N/m}^2$ , respectively; F10 (1:1) and F10 (1:4) represent additions of  $10 \text{ g N/m}^2$  with the  $\text{NO}_3^-$ -N: $\text{NH}_4^+$ -N of 1:1 and 1:4, respectively.  $\text{NO}_3^-$  and  $\text{NH}_4^+$  were added as  $\text{NaNO}_3$  and  $\text{NH}_4\text{Cl}$ , respectively.



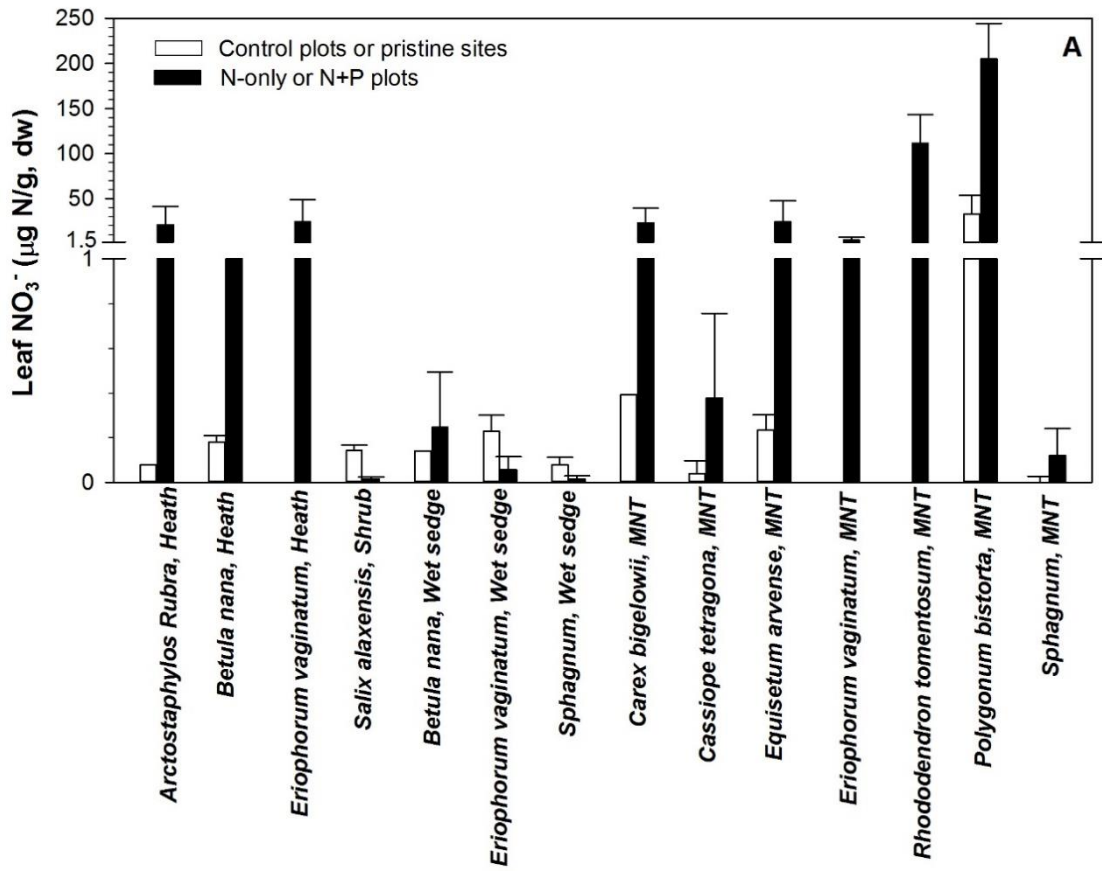

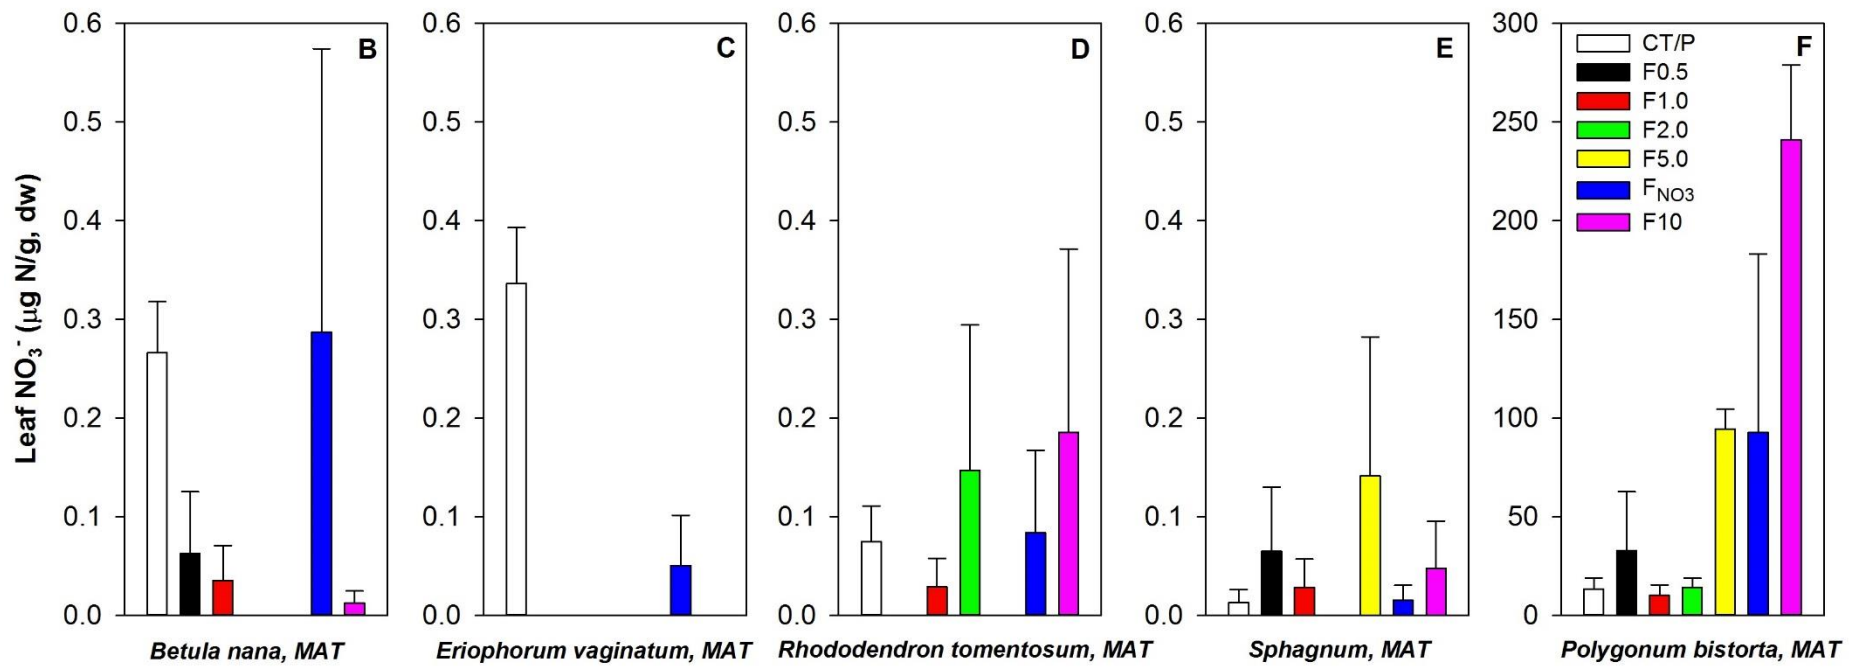

**Fig. S6.** Leaf  $\text{NO}_3^-$  concentrations of plants across different types of tundra ecosystems at TFS. CT/P represent samples collected from control plots or pristine sites out of the replicated block design. (A) Samples of N only ( $10 \text{ g N/m}^2$  as  $\text{NH}_4\text{NO}_3$ ) and N+P ( $10 \text{ g N/m}^2$  as  $\text{NH}_4\text{NO}_3$  +  $5 \text{ g P/m}^2$  as triple superphosphate) were collected from the LTER plots of arctic heath ( $5 \text{ m} \times 20 \text{ m}$  plot size), shrub ( $5 \text{ m} \times 10 \text{ m}$ ), wet sedge ( $5 \text{ m} \times 10 \text{ m}$ ), and MNT (moist non-acid tussock and or non-tussock tundra) ( $5 \text{ m} \times 20 \text{ m}$ ). (B-F) Samples of F0.5 ( $0.5 \text{ g N/m}^2$  as  $\text{NH}_4\text{NO}_3$  +  $0.25 \text{ g P/m}^2$  as triple superphosphate), F1 ( $1 \text{ g N/m}^2$  as  $\text{NH}_4\text{NO}_3$  +  $0.5 \text{ g P/m}^2$  as triple superphosphate), F2 ( $2 \text{ g N/m}^2$  as  $\text{NH}_4\text{NO}_3$  +  $1 \text{ g P/m}^2$  as triple superphosphate), F5 ( $5 \text{ g N/m}^2$  as  $\text{NH}_4\text{NO}_3$  +  $2.5 \text{ g P/m}^2$  as triple superphosphate),  $\text{F}_{\text{NO}_3}$  ( $5 \text{ g N/m}^2$  as  $\text{NaNO}_3$  +  $2.5 \text{ g P/m}^2$  as triple superphosphate), and F10 ( $10 \text{ g N/m}^2$  as  $\text{NH}_4\text{NO}_3$  +  $5 \text{ g P/m}^2$  as triple superphosphate) were collected from plots of MAT ( $5 \text{ m} \times 20 \text{ m}$ ). Mean  $\pm$  SE values were shown,  $n = 3-11$  except for *Rhododendron tomentosum*, MNT ( $n = 2$ ) and *Polygonum bistorta*, MNT ( $n = 2$ ).

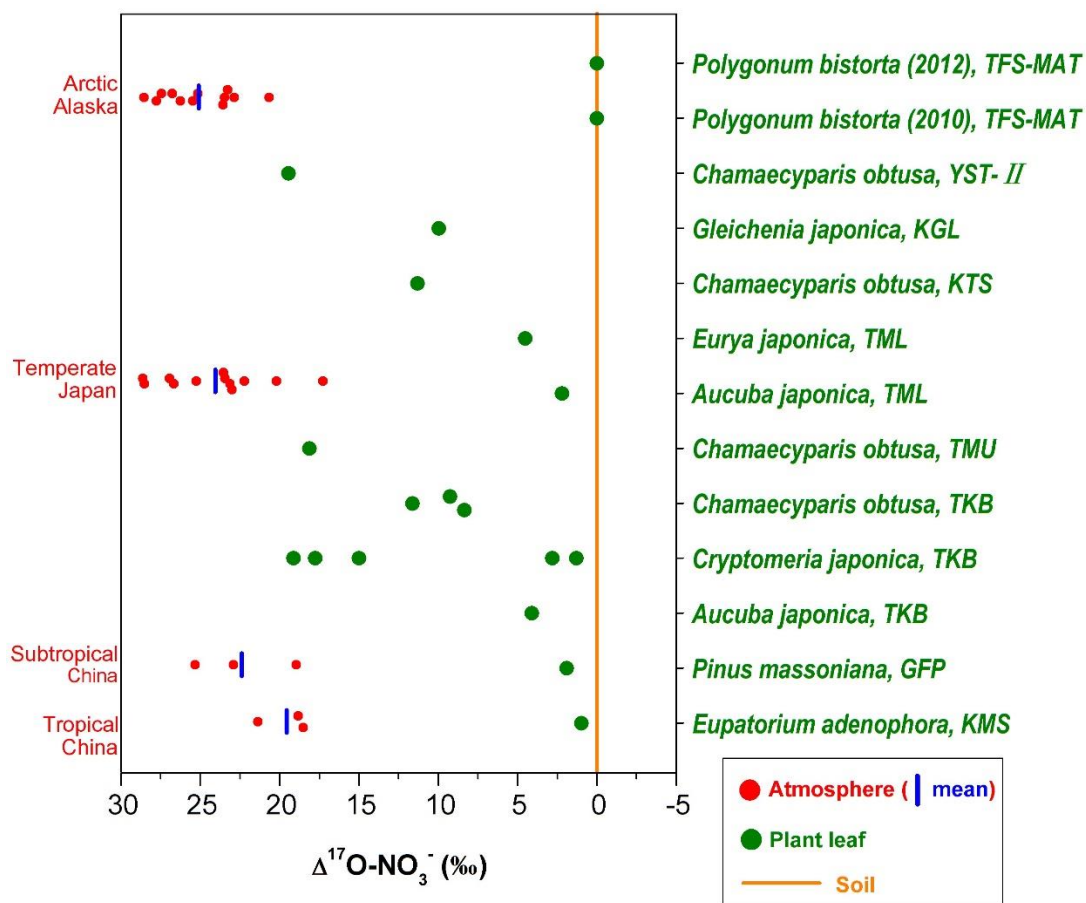

**Fig. S7.**  $\Delta^{17}\text{O}$  values of  $\text{NO}_3^-$  in plant leaves across different ecosystems. The  $\Delta^{17}\text{O}$  of soil  $\text{NO}_3^-$  was assumed as zero. The  $\Delta^{17}\text{O}$  values of atmospheric  $\text{NO}_3^-$  in arctic Alaska and tropical China were cited from that of snowpack  $\text{NO}_3^-$  ( $n = 12$ ; (24)) in Barrow, Alaska and precipitation  $\text{NO}_3^-$  ( $n = 3$ ) in Jianfengling forests of Hainan, tropical China (25), respectively. The  $\Delta^{17}\text{O}$  of atmospheric  $\text{NO}_3^-$  in temperate Japan and subtropical China was based on that of precipitation  $\text{NO}_3^-$  in TML ( $n = 12$ ) and Guiyang ( $n = 3$ ) in this study. Full site information is given in Table S1.

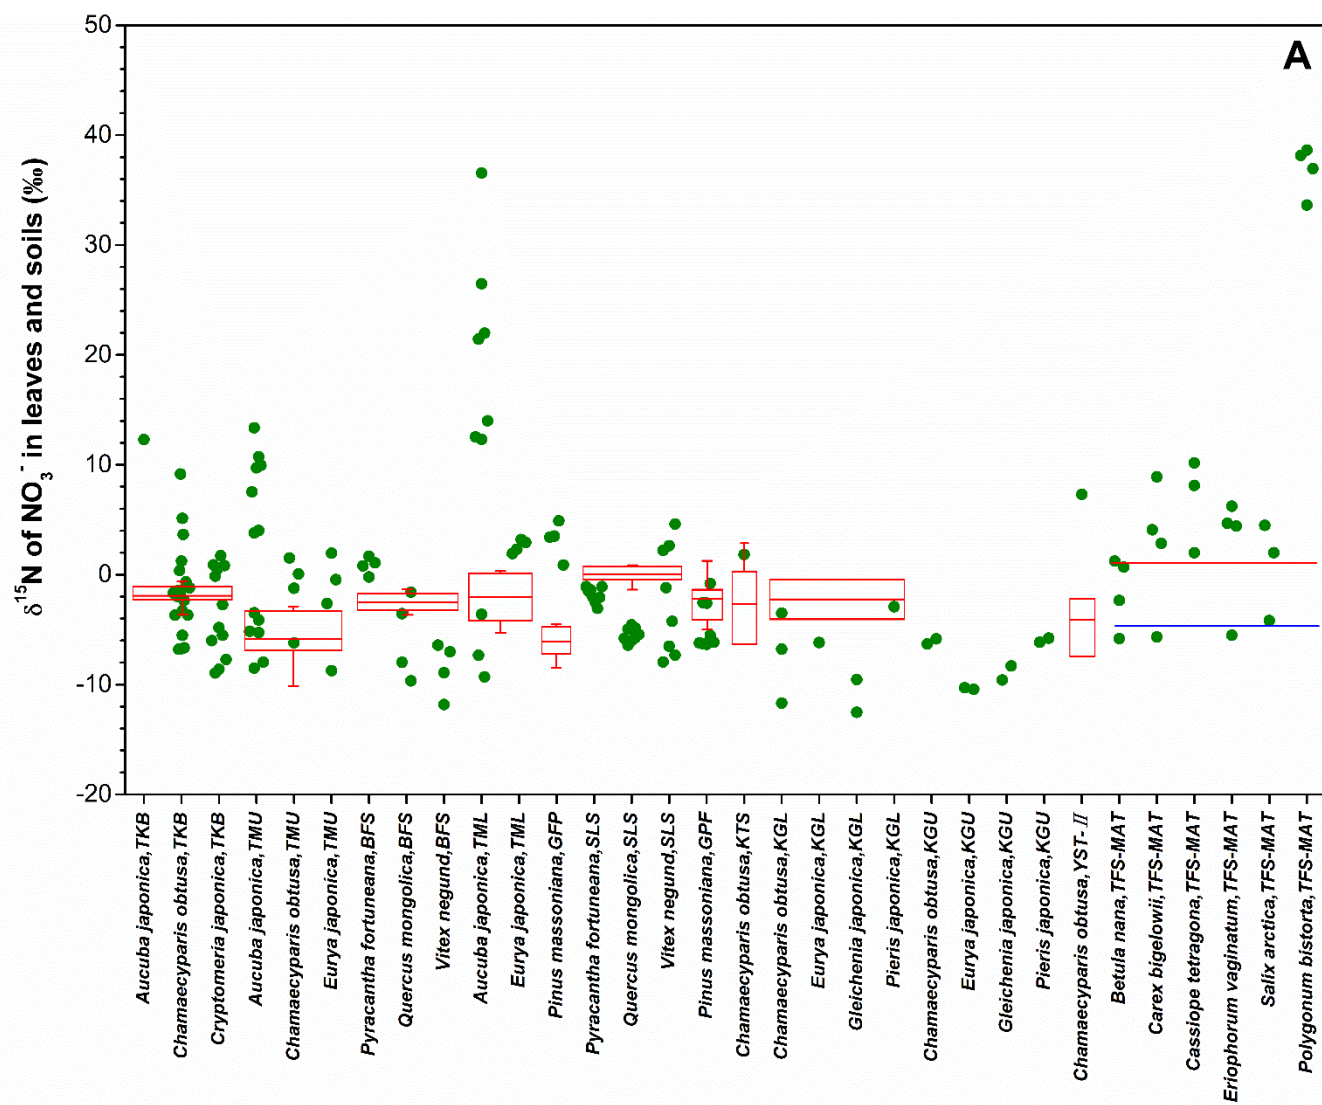

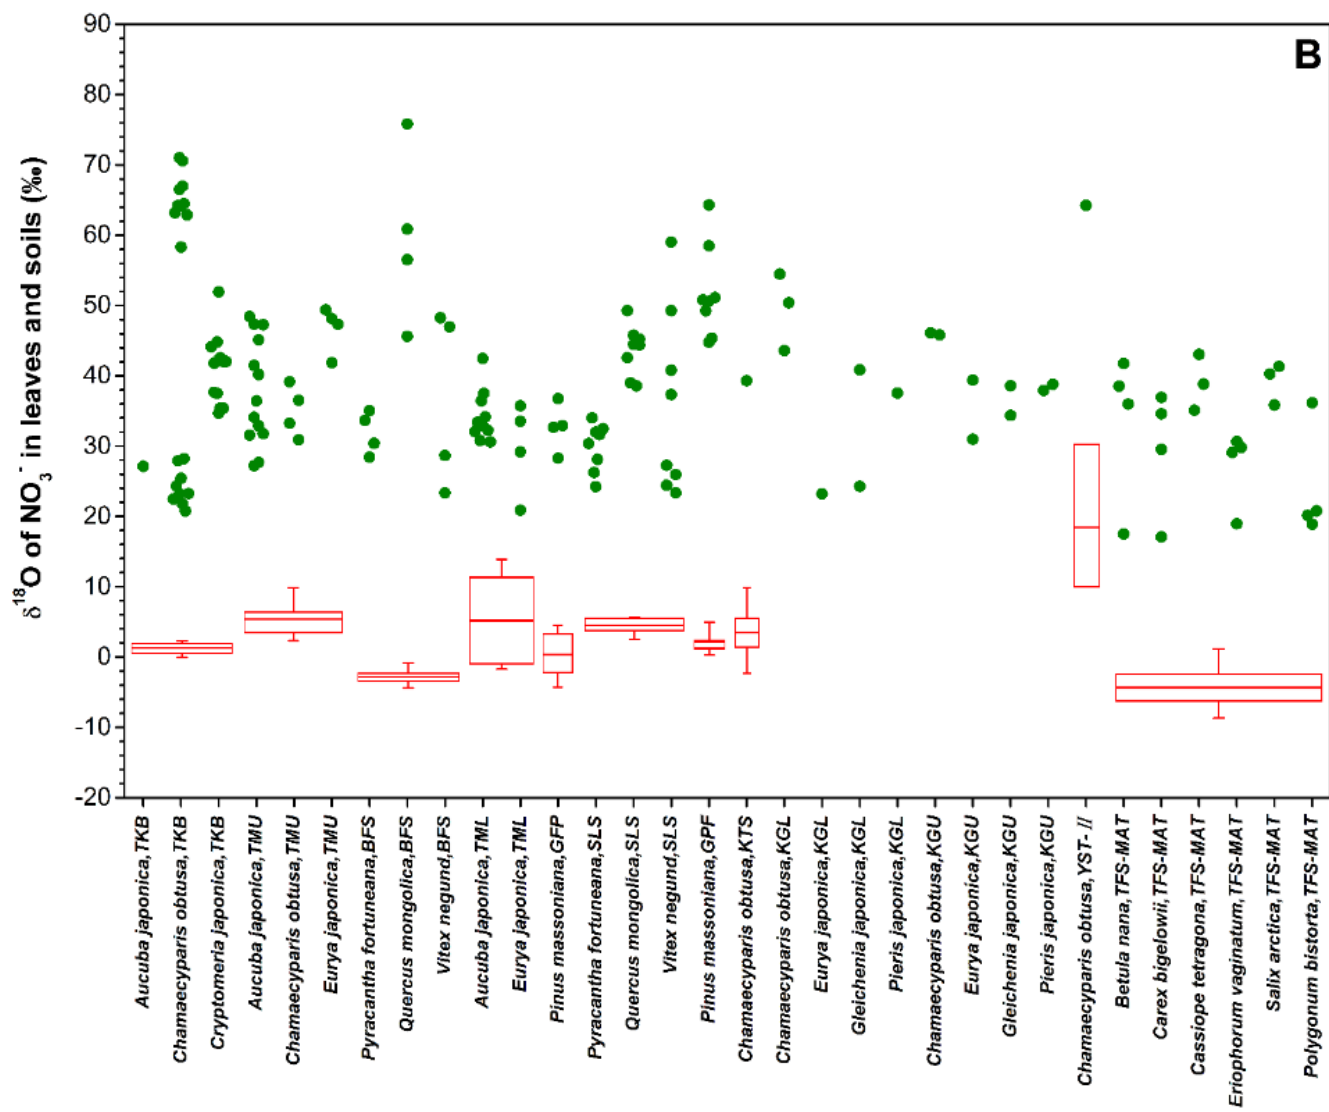

**Fig. S8.**  $\delta^{15}\text{N}$  (A) and  $\delta^{18}\text{O}$  (B) values of  $\text{NO}_3^-$  in plant leaves and soils across different ecosystems. Solid green circles stand for leaves ( $n = 1-40$ ). Red boxes stand for soil extracts ( $n = 2-16$ ). The box encompasses the 25<sup>th</sup>–75<sup>th</sup> percentiles; the solid line within each box and the upper and lower whisker of each box show the mean, maximum, and minimum values, respectively. Mean  $\delta^{15}\text{N}$  of atmospheric  $\text{NO}_3^-$  (blue line in Panel A) and mean  $\delta^{18}\text{O}$  of soil  $\text{NO}_3^-$  for tundra plants were cited from those measured at Barrow, Alaska (26).

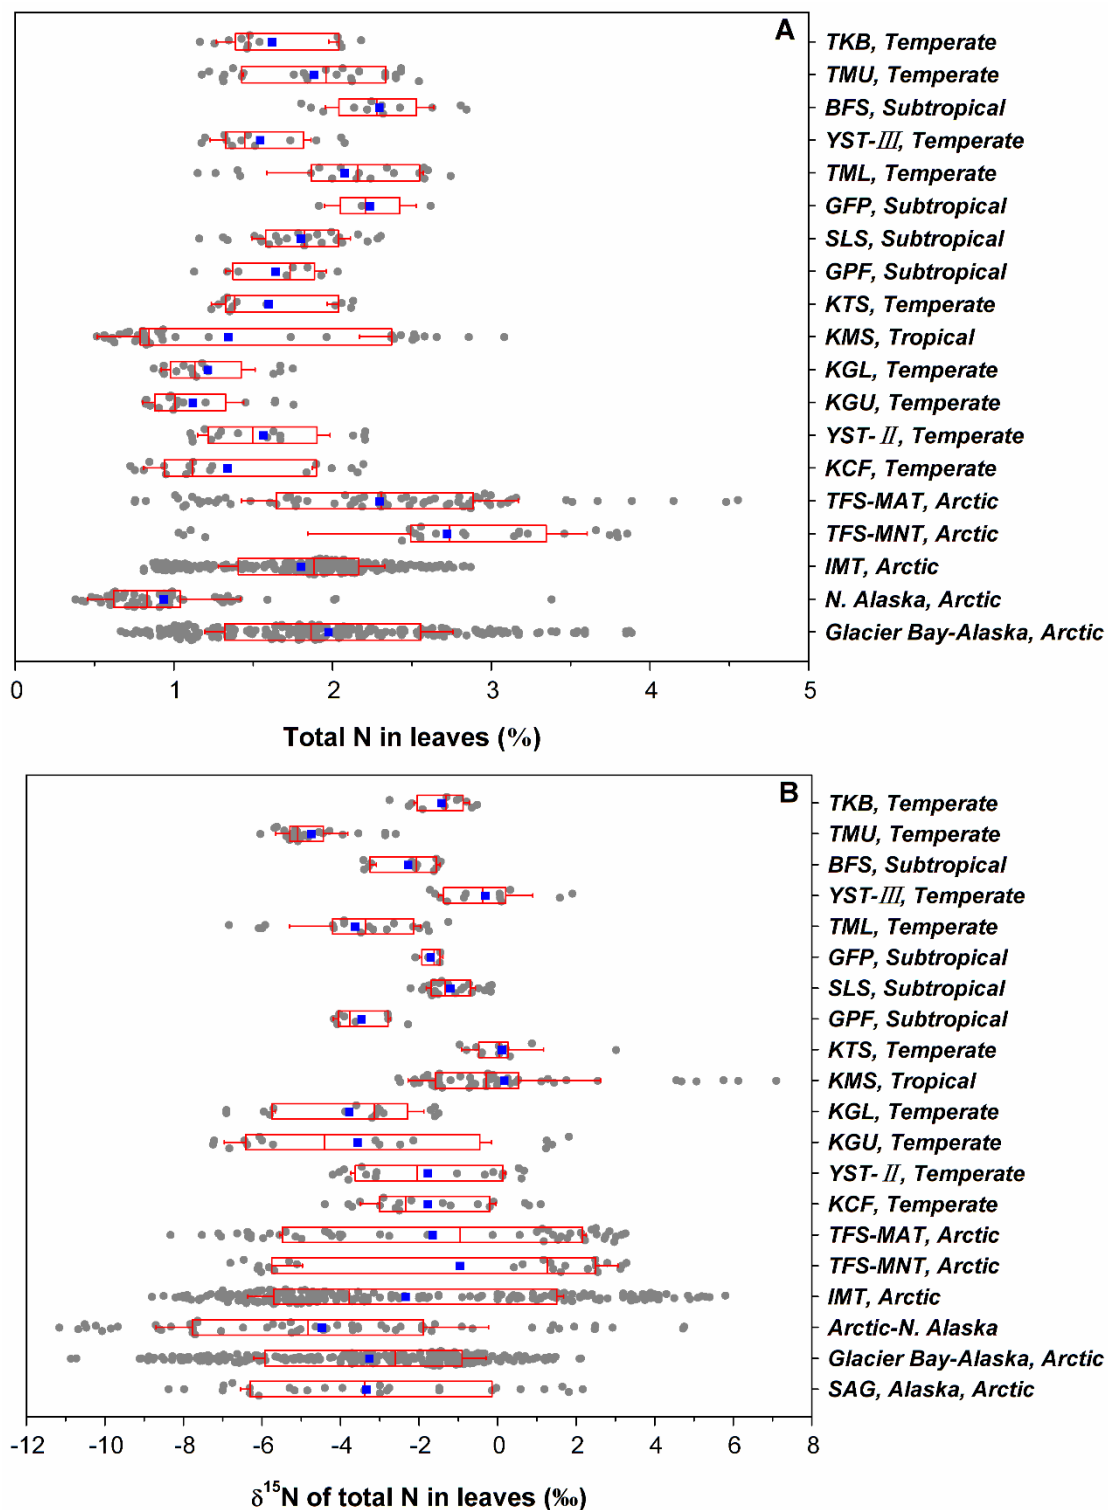

**Fig. S9.** Leaf total N concentrations (A) and total  $\delta^{15}\text{N}$  values (B) of dominant plant species across Alaskan tundra sites and non-arctic sites. Dots around the boxes show replicate data at each site. The box encompasses the 25<sup>th</sup>–75<sup>th</sup> percentiles, whiskers are the SD values. The red line and blue square in each box mark the median and mean values, respectively.  $N$  ranged from 4 to 260 for each site. Data of plants at Glacier Bay, Alaska and northern Alaska (N. Alaska) were cited from (27) and (28), respectively.



**Table S1. Descriptions of study sites, sample collections and analyses.**

| Site, region/Country                                                    | Site abbreviation | Climate     | Latitude   | Longitude   | ME(m) | MT(°C) | MP(mm) |
|-------------------------------------------------------------------------|-------------------|-------------|------------|-------------|-------|--------|--------|
| Mt. Kongming of Xishuangbanna, southwestern (SW) China                  | KMS               | Tropical    | 21° 16' N  | 101° 6.0' E | 1788  | 22.0   | 1600   |
| Guiyang forest park of Guiyang city, SW China                           | GFP               | Subtropical | 26° 34' N  | 106° 45' E  | 1269  | 14.5   | 1100   |
| Mt. Baofushan of Guiyang city, SW China                                 | BFS               | Subtropical | 26° 34' N  | 106° 46' E  | 1230  | 14.5   | 1100   |
| Guaijiu pine forest of Baiyi, Guiyang, SW China                         | GPF               | Subtropical | 26° 48' N  | 107° 1.0' E | 1241  | 15.3   | 1100   |
| Mt. Shilong of Baiyi, Guiyang, SW China                                 | SLS               | Subtropical | 26° 48' N  | 107° 0.8' E | 1329  | 15.3   | 1100   |
| Kamigamo experimental forest of Kyoto Univ. (upperslope), western Japan | KGU               | Temperate   | 35° 4.0' N | 135° 46' E  | 220   | 15.0   | 1584   |
| Kamigamo experimental forest of Kyoto Univ (lowerslope), western Japan  | KGL               | Temperate   | 35° 4.0' N | 135° 46' E  | 200   | 15.0   | 1584   |
| Kochi (Tsunno) forest, southern Japan                                   | KCF               | Temperate   | 33° 26' N  | 133° 01' E  | 710   | 13.1   | 3270   |
| Field Museum Tama-Kyuryo (upperslope) of TUAT, central Japan            | TMU               | Temperate   | 35° 38' N  | 139° 23' E  | 110   | 14.8   | 1790   |
| Field Museum Tama-Kyuryo (lowerslope) of TUAT, central Japan            | TML               | Temperate   | 35° 38' N  | 139° 23' E  | 100   | 14.8   | 1790   |
| Tsukuba Forest Experimental Watershed, central Japan                    | TKB               | Temperate   | 33° 10' N  | 140° 10' E  | 230   | 12.3   | 1390   |
| Katsura forest, central Japan                                           | KTS               | Temperate   | 33° 31' N  | 140° 17' E  | 390   | 11.9   | 1350   |
| Yasato forest-II, central Japan                                         | YST- II           | Temperate   | 33° 17' N  | 140° 09' E  | 180   | 13.1   | 1440   |
| Yasato forest-III, central Japan                                        | YST-III           | Temperate   | 33° 19' N  | 140° 12' E  | 350   | 11.5   | 1460   |
| Toolik field station (MAT), northern Alaska                             | TFS-MAT           | Arctic      | 68° 38' N  | 149° 36' W  | 760   | 9.3*   | 180*   |
| Toolik field station (MNT), northern Alaska                             | TFS-MNT           | Arctic      | 68° 38' N  | 149° 36' W  | 760   | 9.3*   | 180*   |
| Imnavait Creek, northern Alaska                                         | IMT               | Arctic      | 68° 36' N  | 149° 18' W  | 876   | 9.3*   | 180*   |
| Sagavanirktok River Valley, northern Alaska                             | SAG               | Arctic      | 68° 47' N  | 148° 52' W  | 552   | 9.3*   | 180*   |

\* Data of June-August (Growing season). ME, mean elevation. MT, mean annual temperature. MP, mean annual precipitation. MAT, moist acidic tundra. MNT, moist non-acidic tundra.

(Continued, soil sampling and analysis)

| Site       | Type, horizon (cm)                            | Sampling time  | Replicate (n) | Mean pH (H <sub>2</sub> O) | Measured N parameters                                                                                                                                                      | Methods and labs for inorganic N concentrations                                                                                                                                                | Methods and labs for isotope analyses                                                                  |
|------------|-----------------------------------------------|----------------|---------------|----------------------------|----------------------------------------------------------------------------------------------------------------------------------------------------------------------------|------------------------------------------------------------------------------------------------------------------------------------------------------------------------------------------------|--------------------------------------------------------------------------------------------------------|
| <b>KMS</b> | Lateritic, M (0–20)                           | November, 2011 | 5             | 4.6                        | Concentrations of (2N KCl)-extractable NO <sub>3</sub> <sup>-</sup> and NH <sub>4</sub> <sup>+</sup>                                                                       | AutoAnalyzer III, SEAL Analytical GmbH, Germany; Xishuangbanna Tropical Botanical Garden, CAS                                                                                                  | N.A                                                                                                    |
| <b>GFP</b> | Yellow, A <sub>0</sub> &M (0–10)              | July, 2010     | 8             | 4.3                        | Concentrations and isotopes of (2N KCl)-extractable NO <sub>3</sub> <sup>-</sup> , NH <sub>4</sub> <sup>+</sup> , TEN&EON; Net rates of N mineralization and nitrification | The indophenol blue method followed by colorimetry for NH <sub>4</sub> <sup>+</sup> ; AutoAnalyzer (TRAACS 800, Bran+Luebbe, Tokyo, Japan) for NO <sub>3</sub> <sup>-</sup> and TEN&EON; TUAT. | The denitrifier method; An IRMS (Finnigan Delta XP) coupled with Precon and GC (Agilent, HP6890); TUAT |
| <b>BFS</b> | Calcareous & Yellow, A <sub>0</sub> &M (0–10) | July, 2010     | 8             | 6.9                        | Same as that of GFP                                                                                                                                                        | Same as that of GFP                                                                                                                                                                            | Same as that of GFP                                                                                    |
| <b>GPF</b> | Yellow, A <sub>0</sub> &M (0–10)              | July, 2010     | 8             | 4.8                        | Same as that of GFP                                                                                                                                                        | Same as that of GFP                                                                                                                                                                            | Same as that of GFP                                                                                    |
| <b>SLS</b> | Calcareous & Yellow, A <sub>0</sub> &M (0–10) | July, 2010     | 8             | 6.3                        | Same as that of GFP                                                                                                                                                        | Same as that of GFP                                                                                                                                                                            | Same as that of GFP                                                                                    |
| <b>KGL</b> | Cinnamon, A <sub>0</sub> &M (0–20)            | October, 2012  | 9             | 4.0                        | Concentrations of (0.5N K <sub>2</sub> SO <sub>4</sub> )-extractable                                                                                                       | AutoAnalyzer (QuAAtro 2-HR, BL-Tech, Osaka, Japan); TUAT                                                                                                                                       | The denitrifier method; An IRMS (model 20-22; Sercon Ltd) with the                                     |

|            |                                    |                                                                                                                                |   |     |                                                                                                                                                                                                      |                     |                                              |
|------------|------------------------------------|--------------------------------------------------------------------------------------------------------------------------------|---|-----|------------------------------------------------------------------------------------------------------------------------------------------------------------------------------------------------------|---------------------|----------------------------------------------|
|            |                                    |                                                                                                                                |   |     | NO <sub>3</sub> <sup>-</sup> , NH <sub>4</sub> <sup>+</sup> , EON; Net rates of N mineralization and nitrification                                                                                   |                     | same instrument setting and protocol as (29) |
| <b>KGU</b> | Cinnamon, A <sub>0</sub> &M (0–20) | October, 2012                                                                                                                  | 9 | 3.8 | Same as that of KGL                                                                                                                                                                                  | Same as that of KGL | Same as that of KGL                          |
| <b>KCF</b> | Cinnamon, A <sub>0</sub> &M (0–20) | September, 2013                                                                                                                | 9 | N.A | Same as that of KGL                                                                                                                                                                                  | Same as that of KGL | Same as that of KGL                          |
| <b>TMU</b> | Cinnamon, A <sub>0</sub> &M (0–20) | September, 2012                                                                                                                | 9 | 3.7 | Concentrations and isotopes of (0.5N K <sub>2</sub> SO <sub>4</sub> )-extractable NO <sub>3</sub> <sup>-</sup> , NH <sub>4</sub> <sup>+</sup> , EON; Net rates of N mineralization and nitrification | Same as that of KGL | Same as that of KGL                          |
| <b>TML</b> | Cinnamon, M (0–10)                 | September, 2012 for soil extractions; November, 2011 to April, 2012 for soil solutions at depths of 15, 30, 50cm, respectively | 3 | 3.7 | Same as that of TMU<br>See Table S1                                                                                                                                                                  | Same as that of KGL | Same as that of KGL                          |
| <b>TKB</b> | Cinnamon, A <sub>0</sub> &M (0–20) | September, 2012                                                                                                                | 9 | 4.5 | Same as that of TMU                                                                                                                                                                                  | Same as that of KGL | Same as that of KGL                          |
| <b>KTS</b> | Cinnamon, M (0–20)                 | September, 2012                                                                                                                | 6 | 4.7 | Same as that of TMU                                                                                                                                                                                  | Same as that of KGL | Same as that of KGL                          |

|                |                                            |                                                              |     |     |                                                                                                                                                                                                                        |                                                                                                                                                |                                                                                                               |
|----------------|--------------------------------------------|--------------------------------------------------------------|-----|-----|------------------------------------------------------------------------------------------------------------------------------------------------------------------------------------------------------------------------|------------------------------------------------------------------------------------------------------------------------------------------------|---------------------------------------------------------------------------------------------------------------|
| <b>YST-II</b>  | Cinnamon, A <sub>0</sub> &M (0–20)         | September, 2012                                              | 9   | 4.9 | Same as that of TMU                                                                                                                                                                                                    | Same as that of KGL                                                                                                                            | Same as that of KGL                                                                                           |
| <b>YST-III</b> | Cinnamon, A <sub>0</sub> &M (0–20)         | September, 2012                                              | 9   | 4.2 | Same as that of TMU                                                                                                                                                                                                    | Same as that of KGL                                                                                                                            | Same as that of KGL                                                                                           |
| <b>TFS-MAT</b> | <i>Cryaquep</i> , A <sub>0</sub> &M (0–15) | August, 1990-2006<br>July-August, 2012 (soil solutions only) | 135 | N.A | Same as that of KMS. See Table S1, Figs.S1&S2                                                                                                                                                                          | Spectrophotometer and auto-analyzer; MBL                                                                                                       | N.A                                                                                                           |
| <b>TFS-MNT</b> | <i>Cryaquep</i> , A <sub>0</sub> &M (0–15) | August, 1998-2006                                            | 54  | N.A | Same as that of TFS-MAT                                                                                                                                                                                                | Same as that of TFS-MAT                                                                                                                        | N.A                                                                                                           |
| <b>IMT</b>     | <i>Cryaquep</i> , A <sub>0</sub> &M (*)    | July-August, 2000                                            | 93  | N.A | Total N% and $\delta^{15}\text{N}$ ; Concentrations of (2N KCl)-extractable $\text{NO}_3^-$ , $\text{NH}_4^+$ , EON; $\delta^{15}\text{N-NH}_4^+$ ; Net rates of N mineralization and nitrification See Figs.S1 and S2 | The buried-bag and field-incubation method (1 <sup>st</sup> -July to 12 <sup>th</sup> -August) for net N rates; Others same as that of TFS-MAT | EA-IRMS for total N% and $\delta^{15}\text{N}$ . Diffusion method for $\delta^{15}\text{N-NH}_4^+$ ; MBL (30) |
| <b>SAG</b>     | <i>Cryaquep</i> , A <sub>0</sub> &M (0–15) | August, 1987-2005                                            | 151 | N.A | Same as that of TFS-MAT                                                                                                                                                                                                | Same as that of TFS-MAT                                                                                                                        | N.A                                                                                                           |

\*Samples were collected by each horizon (including Oa, Oe, Oe+a, Oi, Oi+a, Oi+e layers, if available and visible) along the landscape toposequence (crest and shoulder, footslope, lower backslope, upper backslope). Soils of tundra sites are histic pergelic cryaquepts overlying a silty mineral soil and permafrost. A<sub>0</sub>, organic layer. M, mineral soil. EON, dissolved organic N (the difference between total dissolved N and ( $\text{NO}_3^-$ - plus  $\text{NH}_4^+$ -N)). CAS, Chinese Academy of Sciences; TUAT, Tokyo University of Agriculture and Technology. MBL, Marine Biology Laboratory. N.A, data not available. IRMS, isotope-ratio mass spectrometer.

(Continued, plant sampling and analysis)

| Site       | Dominant vegetation                                        | Organs collected (time)                     | Measured N parameters                                                                                                        | Methods and labs for total N                      | Methods and labs for tissue NO <sub>3</sub> <sup>-</sup>                                                                                                                                                                                             |
|------------|------------------------------------------------------------|---------------------------------------------|------------------------------------------------------------------------------------------------------------------------------|---------------------------------------------------|------------------------------------------------------------------------------------------------------------------------------------------------------------------------------------------------------------------------------------------------------|
| <b>KMS</b> | Herbs, invaded by alien shrubberies                        | Mature leaves & fine roots (November, 2011) | Leaf total N & total δ <sup>15</sup> N; Leaf NO <sub>3</sub> <sup>-</sup> concentrations and Δ <sup>17</sup> O values        | EA (Flash2000) coupled with IRMS (MAT-253); IGCAS | The denitrifier method; A GC-ECD (GC-14B, Shimadzu) for concentrations                                                                                                                                                                               |
| <b>GFP</b> | Conifer (P&S), mainly <i>Pinus</i>                         | Mature leaves & fine roots (July, 2010)     | Total N&δ <sup>15</sup> N; Tissue NO <sub>3</sub> <sup>-</sup> concentrations & tissue NO <sub>3</sub> <sup>-</sup> isotopes | EA (Flash1112) coupled with IRMS (Delta-XP); TUAT | Same as that of KMS for concentrations; IRMS (Delta XP) coupled with Precon and GC (Agilent, HP6890) for δ <sup>15</sup> N and δ <sup>18</sup> O; TUAT. Thermal decomposition coupled with an IRMS (Delta Plus Advantage) for Δ <sup>17</sup> O, UW. |
| <b>BFS</b> | Shrubbery (S), a mixture of Broadleaves & evergreen shrubs | Same as that of GFP                         | Same as that of GFP                                                                                                          | Same as that of GFP                               | Same as that of GFP                                                                                                                                                                                                                                  |
| <b>GPF</b> | Conifer (P&S), mainly <i>Pinus</i>                         | Same as that of GFP                         | Same as that of GFP                                                                                                          | Same as that of GFP                               | Same as that of GFP                                                                                                                                                                                                                                  |

|            |                                                                                                             |                                                                                                                                                                    |                                                                                                                                                                   |                     |                                                                                                                                                                                                                        |
|------------|-------------------------------------------------------------------------------------------------------------|--------------------------------------------------------------------------------------------------------------------------------------------------------------------|-------------------------------------------------------------------------------------------------------------------------------------------------------------------|---------------------|------------------------------------------------------------------------------------------------------------------------------------------------------------------------------------------------------------------------|
| <b>SLS</b> | Shrubbery (S), mixed by broadleaves & evergreen shrubs                                                      | Same as that of GFP                                                                                                                                                | Same as that of GFP                                                                                                                                               | Same as that of GFP | Same as that of GFP                                                                                                                                                                                                    |
| <b>KGL</b> | Conifer (P&S), mainly <i>Chamaecyparis obtusa</i> , with understories mixed by deciduous & evergreen shrubs | Same as that of GFP (October, 2012)                                                                                                                                | Total N & total $\delta^{15}\text{N}$ ; Tissue $\text{NO}_3^-$ concentrations (all available) & tissue $\text{NO}_3^-$ isotopes (available for leaf samples only) | Same as that of GFP | Same as that of KMS for concentrations and $\Delta^{17}\text{O}$ . An IRMS (model 20-22; Sercon Ltd) with the same instrument setting and protocol as (29) for $\delta^{15}\text{N}$ and $\delta^{18}\text{O}$ , TUAT. |
| <b>KGU</b> | Assembling that of KGL                                                                                      | Same as that of KGL                                                                                                                                                | Same as that of KGL                                                                                                                                               | Same as that of GFP | Same as that of KGL                                                                                                                                                                                                    |
| <b>KCF</b> | Assembling that of KGL                                                                                      | Same as that of GFP (September, 2013)                                                                                                                              | Leaf total N & total $\delta^{15}\text{N}$ ; Leaf $\text{NO}_3^-$ concentrations                                                                                  | Same as that of GFP | Same as that of KGL                                                                                                                                                                                                    |
| <b>TMU</b> | Assembling that of KGL, but N-saturated                                                                     | Mature leaves only for <i>Aucuba japonica</i> (November, 2011; March, June, November, 2012), Mature leaves & fine roots for all studying species (September, 2012) | Same as that of GFP                                                                                                                                               | Same as that of GFP | Same as that of KGL                                                                                                                                                                                                    |
| <b>TML</b> | With very few <i>C. obtusa</i> , but N-saturated                                                            | Same as that of TMU                                                                                                                                                | Same as that of GFP                                                                                                                                               | Same as that of GFP | Same as that of KGL                                                                                                                                                                                                    |
| <b>TKB</b> | Assembling that of KGL                                                                                      | Mature leaves & fine roots (February, 2012 only for <i>C. obtusa</i> & <i>Cryptomeria japonica</i> ; September, 2012 for <i>C. obtusa</i> & understories)          | Same as that of KGL                                                                                                                                               | Same as that of GFP | Same as that of KGL                                                                                                                                                                                                    |
| <b>KTS</b> | Assembling that of KGL                                                                                      | Mature leaves & fine roots (September, 2012)                                                                                                                       | Same as that of KGL                                                                                                                                               | Same as that of GFP | Same as that of KGL                                                                                                                                                                                                    |

|                      |                                                                                                                                                                                                                                                                                    |                                                                                                                                                                                                                      |                                                                                                                                                                                                                                                                     |                                                                     |                                                                                                      |
|----------------------|------------------------------------------------------------------------------------------------------------------------------------------------------------------------------------------------------------------------------------------------------------------------------------|----------------------------------------------------------------------------------------------------------------------------------------------------------------------------------------------------------------------|---------------------------------------------------------------------------------------------------------------------------------------------------------------------------------------------------------------------------------------------------------------------|---------------------------------------------------------------------|------------------------------------------------------------------------------------------------------|
| <b>YST-II</b>        | Assembling that of KGL                                                                                                                                                                                                                                                             | Same as that of KTS                                                                                                                                                                                                  | Same as that of KGL                                                                                                                                                                                                                                                 | Same as that of GFP                                                 | Same as that of KGL                                                                                  |
| <b>YST-III</b>       | Assembling that of KGL                                                                                                                                                                                                                                                             | Same as that of KTS                                                                                                                                                                                                  | Leaf total N & total $\delta^{15}\text{N}$ ;<br>Leaf $\text{NO}_3^-$ concentrations                                                                                                                                                                                 | Same as that of GFP                                                 | Same as that of KGL                                                                                  |
| <b>TFS-MAT</b>       | Acidic tundra, mainly as the grass of <i>Eriophorum</i> , mixed with few deciduous shrubs such as <i>Betula</i> , <i>Salix</i> ; evergreen shrubs such as <i>Cassiope</i> , <i>Rhododendron</i> ; forb such as <i>Polygonum</i> ; sedge such as <i>Carex</i> ; and <i>Sphagnum</i> | Leaves (August, 2001; August, 2010); Roots (June, 2010); Leaves & roots in short-term fertilizing plots (August, 2012); Leaves & roots at pristine/control sites and leaves in LTER blocks/plots (July-August, 2012) | Leaf N% and total $\delta^{15}\text{N}$ ratios (August, 2001); Leaf NRA (control and fertilizing plots); Tissue $\text{NO}_3^-$ concentrations (all samples) & tissue $\text{NO}_3^-$ isotopes (roots collected in 2007; Part of leaves collected in 2010 and 2012) | AutoAnalyzer III for NRA; EA-IRMS for total N, CER Kyoto University | A GC-ECD (GC-2014, Shimadzu) for plants collected from fertilizing plots. Others same as that of GFP |
| <b>TFS-MNT-T</b>     | Non-acidic and tussock, mainly <i>Eriophorum</i> , <i>Carex</i> , <i>Cassiope</i> , <i>Polygonum</i> , <i>Equisetum</i> , <i>Sphagnum</i>                                                                                                                                          | Leaves & roots at pristine/control sites and leaves only in LTER blocks/plots (July-August, 2012)                                                                                                                    | Leaf NRA (control and fertilizing plots); Tissue $\text{NO}_3^-$ concentrations only.                                                                                                                                                                               | Same as that of TFS-MAT                                             | Same as that of TFS-MAT                                                                              |
| <b>TFS-MNT-NT</b>    | Non-acidic & non-tussock, assembling species of MNT-T                                                                                                                                                                                                                              | Leaves & roots at pristine/control sites and leaves only in LTER blocks/plots (July-August, 2012)                                                                                                                    | Tissue $\text{NO}_3^-$ concentrations only                                                                                                                                                                                                                          | N.A                                                                 | Same as that of TFS-MAT                                                                              |
| <b>TFS-Heath</b>     | Low productivity, mixed by <i>Betula</i> , <i>Arctous</i> , <i>Juniperus</i> , <i>Rhododendron</i> , <i>Vaccinium</i> , <i>Polygonum</i>                                                                                                                                           | Leaves & roots at pristine/control sites and leaves only in LTER blocks/plots (July-August, 2012)                                                                                                                    | Tissue $\text{NO}_3^-$ concentrations only                                                                                                                                                                                                                          | N.A                                                                 | Same as that of TFS-MAT                                                                              |
| <b>TFS-Wet sedge</b> | Mainly as the sedge, grass of <i>Eriophorum</i> , <i>Sphagnum</i> ,                                                                                                                                                                                                                | Leaves & roots at pristine/control sites and leaves                                                                                                                                                                  | Tissue $\text{NO}_3^-$ concentrations only                                                                                                                                                                                                                          | N.A                                                                 | Same as that of TFS-MAT                                                                              |

|                  |                                                                                                                            |                                                                                                                                                        |                                                                       |                                                   |                         |
|------------------|----------------------------------------------------------------------------------------------------------------------------|--------------------------------------------------------------------------------------------------------------------------------------------------------|-----------------------------------------------------------------------|---------------------------------------------------|-------------------------|
|                  | mixed with a few <i>Vaccinium</i> and <i>Betula</i> species                                                                | only in LTER blocks/plots (July-August, 2012)                                                                                                          |                                                                       |                                                   |                         |
| <b>TFS-Shrub</b> | High productivity, mainly as the deciduous shrub of <i>Salix</i> , mixed with <i>Sphagnum</i> and a very few other species | Leaves & roots at pristine/control sites and leaves only in LTER blocks/plots (July-August, 2012)                                                      | Tissue NO <sub>3</sub> <sup>-</sup> concentrations only               | N.A                                               | Same as that of TFS-MAT |
| <b>IMT</b>       | Assembling species compositions of MAT                                                                                     | Leaves of plants at pristine sites along the landscape topsequence (Crest & shoulder, footslope, lower backslope, upper backslope) (July-August, 2001) | Leaf NRA (pristine sites); Leaf N% and total δ <sup>15</sup> N ratios | EA-IRMS with a manual 'cryoflow' system, MBL (30) | N.A                     |

S, secondary; P, planted; M, mineral soil; O, organic layer; NRA, nitrate reductase activity. IGCAS, Institute of Geochemistry, Chinese Academy of Sciences. UA, University of Washington. N.A, data not available.



**Table S2. Mean NO<sub>3</sub><sup>-</sup> concentrations in leaves and roots (µg N/g, dw), total leaf N (%) and δ<sup>15</sup>N (‰) in plants across arctic and non-arctic sites. Mean ± SE (number of replicate samples) are shown. n.a indicating data not available.**

| <i>Species, Site</i>                 | Leaf NO <sub>3</sub> <sup>-</sup> | Root NO <sub>3</sub> <sup>-</sup> | Leaf N       | Leaf δ <sup>15</sup> N |
|--------------------------------------|-----------------------------------|-----------------------------------|--------------|------------------------|
| <i>Aucuba japonica, TKB</i>          | 2.1±0.2 (4)                       | 2635.1±245.8 (4)                  | 2.1±0.0 (4)  | -1.1±0.2 (4)           |
| <i>Cryptomeria japonica, TKB</i>     | 1.0±0.0 (6)                       | 28.6±3.6 (4)                      | n.a          | n.a                    |
| <i>Chamaecyparis obtusa, TKB</i>     | 2.1±0.3 (13)                      | 316.9±310.3 (2)                   | 1.5±0.0 (4)  | -0.9±0.1 (4)           |
| <i>Eurya japonica, TKB</i>           | 1.1±0.1 (4)                       | 142.3±85.1 (4)                    | 1.3±0.1 (4)  | -2.3±0.2 (4)           |
| <i>Aucuba japonica, TMU</i>          | 0.8±0.3 (4)                       | 292.4±49.8 (4)                    | 2.2±0.1 (17) | -4.7±0.2 (17)          |
| <i>Chamaecyparis obtusa, TMU</i>     | 0.9±0.3 (4)                       | 26.9±3.2 (4)                      | 1.3±0.0 (4)  | -4.7±0.4 (4)           |
| <i>Eurya japonica, TMU</i>           | 0.8±0.2 (4)                       | 546.4±83.2 (4)                    | 1.3±0.1 (4)  | -4.9±0.5 (4)           |
| <i>Pyracantha fortuneana, BFS</i>    | 0.7±0.0 (4)                       | 1.1±0.1 (4)                       | 2.0±0.1 (4)  | -1.5±0.0 (4)           |
| <i>Quercus mongolica, BFS</i>        | 0.8±0.2 (4)                       | 1.9±0.1 (4)                       | 2.3±0.0 (4)  | -3.3±0.0 (4)           |
| <i>Vitex negundo, BFS</i>            | 0.9±0.2 (4)                       | 4.5±0.9 (4)                       | 2.6±0.2 (4)  | -2.0±0.1 (4)           |
| <i>Aucuba japonica, YST-III</i>      | 0.4±0.0 (4)                       | 271.0±78.3 (4)                    | 1.9±0.1 (4)  | -0.6±0.4 (4)           |
| <i>Chamaecyparis obtusa, YST-III</i> | 0.4±0.1 (4)                       | 0.9±0.2 (4)                       | 1.3±0.0 (4)  | -1.4±0.2 (4)           |
| <i>Eurya japonica, YST-III</i>       | 0.5±0.1 (4)                       | 55.5±6.8 (4)                      | 1.4±0.0 (4)  | 1.0±0.5 (4)            |
| <i>Aucuba japonica, TML</i>          | 1.5±0.7 (4)                       | 1150.7±213.7 (4)                  | 2.3±0.1 (14) | -2.9±0.3 (14)          |
| <i>Eurya japonica, TML</i>           | 0.6±0.1 (4)                       | 225.3±32.4 (4)                    | 1.3±0.1 (4)  | -6.2±0.2 (4)           |
| <i>Pinus massoniana, GFP</i>         | 2.1±0.1 (4)                       | 1.4±0.0 (4)                       | 2.2±0.1 (4)  | -1.7±0.1 (4)           |
| <i>Pyracantha fortuneana, SLS</i>    | 0.6±0.0 (8)                       | 0.8±0.1 (4)                       | 2.0±0.1 (8)  | -0.5±0.1 (8)           |
| <i>Quercus mongolica, SLS</i>        | 0.7±0.1 (8)                       | 1.3±0.1 (4)                       | 1.5±0.1 (8)  | -1.6±0.1 (8)           |
| <i>Vitex negundo, SLS</i>            | 0.6±0.0 (8)                       | 1.8±0.2 (4)                       | 1.9±0.1 (8)  | -1.4±0.2 (8)           |
| <i>Pinus massoniana, GPF</i>         | 1.4±0.2 (8)                       | 0.6±0.1 (8)                       | 1.6±0.1 (8)  | -3.5±0.3 (8)           |
| <i>Aucuba japonica, KTS</i>          | 0.4±0.0 (4)                       | 281.0±112.2 (4)                   | 2.1±0.0 (4)  | -0.4±0.2 (4)           |
| <i>Chamaecyparis obtusa, KTS</i>     | 0.5±0.2 (4)                       | 3.9±1.6 (4)                       | 1.3±0.0 (4)  | -0.2±0.3 (4)           |

|                                            |             |                    |                 |                  |
|--------------------------------------------|-------------|--------------------|-----------------|------------------|
| <i>Eurya japonica</i> , KTS                | 0.5±0.1 (4) | 87.9±40.2<br>(4)   | 1.4±0.1<br>(4)  | 0.9±0.7<br>(4)   |
| <i>Imperata cylindrical</i> , KMS          | 0.9±0.1 (2) | n.a                | 0.8±0.0<br>(15) | -1.1±0.2<br>(15) |
| <i>Sporobolus virginicus</i> , KMS         | 0.7±0.0 (2) | n.a                | 0.7±0.0<br>(11) | -0.8±0.3<br>(11) |
| <i>Terricolous mosses</i> , KMS            | 1.2 (1)     | n.a                | 0.8±0.0<br>(4)  | -1.5±0.3<br>(4)  |
| <i>Eupatorium adenophora</i> ,<br>KMS      | 3.8±2.2 (4) | n.a                | 2.5±0.1<br>(15) | 2.6±0.7<br>(15)  |
| <i>Chamaecyparis obtusa</i> , KGL          | 0.4±0.1 (4) | 2.8±1.1 (4)        | 0.9±0.0<br>(4)  | -3.9±0.7<br>(4)  |
| <i>Eurya japonica</i> , KGL                | 0.6±0.1 (4) | 0.7±0.2 (4)        | 1.1±0.0<br>(4)  | -3.2±0.1<br>(4)  |
| <i>Pieris japonica</i> , KGL               | 0.8±0.1 (4) | 0.5±0.1 (4)        | 1.7±0.0<br>(4)  | -1.6±0.0<br>(4)  |
| <i>Gleichenia japonica</i> , KGL           | 0.9±0.1 (4) | 0.3±0.1 (4)        | 1.2±0.0<br>(4)  | -6.3±0.3<br>(4)  |
| <i>Chamaecyparis obtusa</i> , KGU          | 0.3±0.1 (4) | 0.4±0.0 (4)        | 0.8±0.0<br>(4)  | -6.8±0.2<br>(4)  |
| <i>Eurya japonica</i> , KGU                | 0.6±0.0 (4) | 0.4±0.0 (4)        | 1.0±0.1<br>(4)  | -2.7±0.2<br>(4)  |
| <i>Pieris japonica</i> , KGU               | 0.5±0.1 (4) | 0.4±0.1 (4)        | 1.0±0.0<br>(4)  | 1.4±0.1<br>(4)   |
| <i>Gleichenia japonica</i> , KGU           | 0.8±0.1 (4) | 0.1±0.0 (4)        | 1.6±0.1<br>(4)  | -6.2±0.2<br>(4)  |
| <i>Aucuba japonica</i> , YST-II            | 0.6±0.1 (4) | 329.1±191.2<br>(4) | 1.6±0.0<br>(4)  | -3.4±0.3<br>(4)  |
| <i>Chamaecyparis obtusa</i> , YST-<br>II   | 2.2±0.3 (4) | 1.7±0.5 (4)        | 1.2±0.1<br>(4)  | -3.8±0.1<br>(4)  |
| <i>Eurya japonica</i> , YST-II             | 0.5±0.1 (4) | 18±7.7 (4)         | 1.3±0.0<br>(4)  | -0.3±0.2<br>(4)  |
| <i>Hydrangea hirta</i> , YST-II            | 1.1±0.1 (4) | 2.6±1.0 (2)        | 2.2±0.0<br>(4)  | 0.5±0.1<br>(4)   |
| <i>Chamaecyparis obtusa</i> , KCF          | 0.3±0.1 (6) | n.a                | 0.8±0.0<br>(6)  | -3.3±0.3<br>(6)  |
| <i>Eurya japonica</i> , KCF                | 0.2±0.0 (6) | n.a                | 1.1±0.0<br>(6)  | 0.1±0.4<br>(6)   |
| <i>Lindera triloba</i> , KCF               | 0.9±0.2 (6) | 0.6±0.2 (3)        | 2.0±0.1<br>(6)  | -2.2±0.5<br>(6)  |
| <i>Arctostaphylos alpina</i> , TFS-<br>MAT | n.a         | n.a                | 1.8±0.0<br>(3)  | n.a              |
| <i>Betula nana</i> , TFS-MAT               | 0.2±0.0 (3) | 0.8±0.2 (6)        | 2.5±0.1<br>(9)  | -6.4±0.4<br>(8)  |
| <i>Carex bigelowii</i> , TFS-MAT           | 0.4±0.0 (3) | 0.7±0.2 (7)        | 3.0±0.0<br>(8)  | 2.4±0.2<br>(8)   |
| <i>Cassiope tetragona</i> , TFS-<br>MAT    | 0.3±0.1 (4) | 0.4 (1)            | 1.1±0.0<br>(8)  | -4.6±0.4<br>(5)  |

|                                               |                    |              |                 |                 |
|-----------------------------------------------|--------------------|--------------|-----------------|-----------------|
| <i>Dryas integrifolia</i> , TFS-MAT           | n.a                | n.a          | 1.6±0.1<br>(3)  | n.a             |
| <i>Equisetum arvense</i> , TFS-MAT            | n.a                | n.a          | 2.5±0.1<br>(3)  | n.a             |
| <i>Eriophorum angustifolium</i> ,<br>TFS-MAT  | n.a                | n.a          | 2.3±0.0<br>(3)  | 1.6±0.8<br>(9)  |
| <i>Eriophorum vaginatum</i> , TFS-<br>MAT     | 0.3±0.1 (6)        | 0.9±0.5 (3)  | 2.5±0.1<br>(8)  | n.a             |
| <i>Rhododendron tomentosum</i> ,<br>TFS-MAT   | 0.1±0.0 (3)        | 0.4 (1)      | 1.2±0.1<br>(3)  | -6.1±0.6<br>(3) |
| <i>Polygonum bistorta</i> , TFS-<br>MAT       | 13.5±5.5<br>(11)a  | n.a          | 3.8±0.1<br>(13) | 0.9±0.3<br>(6)  |
| <i>Rhododendron lapponicum</i> ,<br>TFS-MAT   | n.a                | n.a          | 1.4±0.1<br>(3)  | n.a             |
| <i>Rubus chamaemorus</i> , TFS-<br>MAT        | n.a                | n.a          | 3.0±0.1<br>(4)  | 1.5 (1)         |
| <i>Salix alaxensis</i> , TFS-MAT              | 0.3±0.0 (3)        | 1.2±0.1 (4)  | 2.5±0.2<br>(3)  | -3.0 (1)        |
| <i>Salix reticulata</i> , TFS-MAT             | n.a                | n.a          | 1.9±0.2<br>(3)  | n.a             |
| <i>Vaccinium uliginosum</i> , TFS-<br>MAT     | n.a                | n.a          | 2.2±0.1<br>(3)  | -4.0 (1)        |
| <i>Vaccinium vitis-idaea</i> , TFS-<br>MAT    | n.a                | n.a          | 0.8±0.0<br>(3)  | -7.1 (1)        |
| <i>Betula nana</i> , TFS-MNT                  | n.a                | n.a          | 2.6±0.1<br>(5)  | -6.0±0.3<br>(5) |
| <i>Sphagnum</i> , TFS-MAT                     | 0.0±0.0 (3)        | n.a          | n.a             | n.a             |
| <i>Carex bigelowii</i> , TFS-MNT              | 0.4 (1)            | 1.2 (1)      | 3.3±0.1<br>(5)  | 2.5±0.4<br>(5)  |
| <i>Cassiope tetragona</i> , TFS-<br>MNT       | 0.0±0.0 (4)        |              | 1.1±0.0<br>(4)  | -5.9±0.2<br>(4) |
| <i>Eriophorum vaginatum</i> , TFS-<br>MNT     | 0.2±0.0 (4)        | 0.4 (1)      | 2.6±0.1<br>(5)  | 2.5±0.1<br>(5)  |
| <i>Equisetum arvense</i> , TFS-<br>MNT        | 0.2±0.1 (5)        | n.a          | n.a             | n.a             |
| <i>Polygonum bistorta</i> , TFS-<br>MNT       | 29.3±16.7<br>(10)b | 0.5±0.1 (18) | n.a             | 1.1±0.2<br>(5)  |
| <i>Sphagnum</i> , TFS-MNT                     | 0.0±0.0 (6)        | n.a          | n.a             | n.a             |
| <i>Arctostaphylos rubra</i> , TFS-<br>Heath   | 0.1 (1)            | 0.4 (1)      | n.a             | n.a             |
| <i>Betula nana</i> , TFS-Heath                | 0.2±0.0 (3)        | 0.3 (1)      | n.a             | n.a             |
| <i>Juniperus communis</i> , TFS-<br>Heath     | 0.0 (1)            | 0.4 (1)      | n.a             | n.a             |
| <i>Rhododendron tomentosum</i> ,<br>TFS-Heath | 0.2 (1)            | 0.6 (1)      | n.a             | n.a             |
| <i>Polygonum bistorta</i> , TFS-<br>Heath     | 0.6±0.3 (3)        | 0.1±0.0 (3)  | n.a             | n.a             |
| <i>Vaccinium</i> , TFS-Heath                  | 0.1±0.1 (2)        | 1.8 (1)      | n.a             | n.a             |
| <i>Sphagnum</i> , TFS-Shrub                   | 0.1±0.0 (2)        | n.a          | n.a             | n.a             |

|                                            |             |             |     |     |
|--------------------------------------------|-------------|-------------|-----|-----|
| <i>Salix alaxensis, TFS-Shrub</i>          | 0.1±0.0 (5) | 0.4±0.1 (4) | n.a | n.a |
| <i>Betula nana, TFS-Wet sedge</i>          | 0.1 (1)     | 0.2 (1)     | n.a | n.a |
| <i>Vaccinium, TFS-Wet sedge</i>            | 0.1 (1)     | 0.5 (1)     | n.a | n.a |
| <i>Eriophorum vaginatum, TFS-Wet sedge</i> | 0.2±0.1 (7) | 0.6±0.2 (2) | n.a | n.a |
| <i>Sphagnum, TFS-Wet sedge</i>             | 0.1±0.0 (4) | n.a         | n.a | n.a |

a: Minimum=0.7, Maximum=65.8 (unit: µg N/g, dw);

b: Minimum=2.6, Maximum=177.1 (unit: µg N/g, dw).

## Reference for Supporting Information

1. Weintraub MN, Schimel JP (2005) The seasonal dynamics of amino acids and other nutrients in Alaskan Arctic tundra soils. *Biogeochemistry* 73:359–380.
2. Darrouzet-Nardi A, Weintraub MN (2014) Evidence for spatially inaccessible labile N from a comparison of soil core extractions and soil pore water lysimetry. *Soil Biol Biochem* 73:22–32.
3. Ludwig B, Teepe R, Lopes de Gerenyu V, Flessa H (2006) CO<sub>2</sub> and N<sub>2</sub>O emissions from gleyic soils in the Russian tundra and a German forest during freeze-thaw periods—a microcosm study. *Soil Biol Biochem* 38:3516–3519.
4. Nordin AI, Schmidt K, Shaver GR (2004) Nitrogen uptake by arctic soil microbes and plants in relation to soil nitrogen supply. *Ecology* 85:955–962.
5. Semenchuk PR, et al. (2015) Deeper snow alters soil nutrient availability and leaf nutrient status in high arctic tundra. *Biogeochemistry* 124:81–94.
6. Harms TK, Jones JB (2012) Thaw depth determines reaction and transport of inorganic nitrogen in valley bottom permafrost soils. *Glob Change Biol* 18:2958–2968.
7. Hobbie SE, Miley TA, Weiss MS (2002) Carbon and nitrogen cycling in soils from acidic and nonacidic tundra with different glacial histories in northern Alaska. *Ecosystems* 5:761–774.
8. Corzo A, Niell FX (1991) Determination of nitrate reductase activity in *Ulva rigida*, *C. agardh* by the *in situ* method. *J Exp Mar Biol Ecol* 146:181–191.
9. Stadler J, Gebauer G (1992) Nitrate reduction and nitrate content in ash trees (*Fraxinus excelsior* L.): distribution between compartments, site comparison and seasonal variation. *Trees* 6:236–240.
10. Widmann K, Gebauer G, Rehder H, Ziegler H (1993) Fluctuations in nitrate reductase activity, and nitrate and organic nitrogen concentrations of succulent plants under different nitrogen and water regimes. *Oecologia* 94:146–152.
11. Gebauer G, Hahn G, Rodenkirchen H, Zuleger M (1998) Effects of acid irrigation and liming on nitrate reduction and nitrate content of *Picea abies* (L.) Karst. and *Oxalis acetosella* L. *Plant Soil* 23:59–70.
12. Koyama L, Tokuchi N, Fukushima K, Terai M, Yamamoto Y (2008) Seasonal changes in nitrate use by three woody species: the importance of the leaf-expansion period. *Trees* 22:851–859.
13. Koba K, Tokuchi N, Yoshioka T, Hobbie EA, Iwatsubo G (1998) Natural abundance of nitrogen-15 in a forest soil. *Soil Sci Soc Am J* 62:778–781.
14. Koyama L, Tokuchi N (2003) Effects of NO<sub>3</sub><sup>-</sup> availability on NO<sub>3</sub><sup>-</sup> use in seedlings of three woody shrub species. *Tree Physiol* 23:281–288.
15. Koyama L, Tokuchi N, Hirobe M, Koba K (2001) The potential of NO<sub>3</sub><sup>-</sup>-N utilization by a woody shrub species *Lindera triloba*: a cultivation test to estimate the saturation point of soil NO<sub>3</sub><sup>-</sup>-N for plants. *The Scientific World J.* 1:514–9.

16. Koyama L, Hirobe M, Koba K, Tokuchi N (2013) Nitrate-use traits of understory plants as potential regulators of vegetation distribution on a slope in a Japanese cedar plantation. *Plant Soil* 362:119–134.
17. Krywult M, Karolak A, Bytnerowicz A (1996) Nitrate reductase activity as an indicator of ponderosa pine response to atmospheric nitrogen deposition in the San Bernardino Mountains. *Environ Pollut* 93:141–146.
18. Tang MH, Porder S, Lovett GM (2012) Species differences in nitrate reductase activity are unaffected by nitrogen enrichment in northeastern US forests. *Forest Ecol Manag* 275:52–59.
19. Sakar FS, Arslan H, Kırmızı S, Güteryüz G (2010) Nitrate reductase activity (NRA) in *Asphodelus aestivus* Brot. (Liliaceae): distribution among organs, seasonal variation and differences among populations. *Flora-Morphology, Distribution, Funct Ecol Plants* 205:527–531.
20. Fortier J, Truax B, Lambert F, Gagnon D, Chevrier N (2012) Clone-specific response in leaf nitrate reductase activity among unrelated hybrid poplars in relation to soil nitrate availability. *Int J Forestry Res* 2012:1–10.
21. Cedergreen N, Madsen TV (2003) Light regulation of root and leaf NO<sub>3</sub><sup>-</sup>, uptake and reduction in the floating macrophyte *Lemna minor*. *New Phytol* 161:449–457.
22. Liu XY, et al. (2012) Preliminary insights into δ<sup>15</sup>N and δ<sup>18</sup>O of nitrate in natural mosses: A new application of the denitrifier method. *Environ Pollut* 162:48–55.
23. Nadelhoffer K, et al. (1996) <sup>15</sup>N natural abundances and N use by tundra plants. *Oecologia* 107:386–394.
24. Morin S, et al. (2012) An isotopic view on the connection between photolytic emissions of NO<sub>x</sub> from the Arctic snowpack and its oxidation by reactive halogens. *J Geophys Res* 117:D00R08.
25. Fang YT, et al. (2015) Microbial denitrification dominates nitrate losses from forest ecosystems. *Proc Nat Acad Sci USA* 112:1470–1474.
26. Heikoop JM, et al. (2015) Isotopic identification of soil and permafrost nitrate sources in an arctic tundra ecosystem. *J Geophys Res* 120:1000–1017.
27. Schulze ED, Chapin III FS, Gebauer G (1994) Nitrogen nutrition and isotope differences among life forms at the northern treeline of Alaska. *Oecologia* 100:406–412.
28. Hobbie EA, Macko SA, Williams M (2000) Correlations between foliar δ<sup>15</sup>N and nitrogen concentrations may indicate plant-mycorrhizal interactions. *Oecologia* 122:273–283.
29. McIlvin MR, Casciotti KL (2011) Technical updates to the bacterial method for nitrate isotopic analyses. *Anal Chem* 83:1850–1856.
30. Fry B, et al. (1996) Cryoflow: cryofocusing nanomole amounts of CO<sub>2</sub>, N<sub>2</sub>, and SO<sub>2</sub> from an elemental analyzer for stable isotopic analysis. *Rapid Commun Mass Spectrom* 10:953–958.
